# Supplementary material
Source: Research Square preprint supplement (doi:10.21203/rs.3.rs-9763432/v1)
Supplement: Supplementary file 1 [file f509e3781dd73797aaa85ec1.docx]

**Table 1:** Enrichment report

Total actives: 25

Total ligands (actives + decoys): 1275

Number of ranked actives: 25

| BEDROC(alpha=160.9, alpha*Ra=3.1549): 0.341  BEDROC(alpha=20.0, alpha*Ra=0.3922): 0.741  BEDROC(alpha=8.0, alpha*Ra=0.1569): 0.883  ROC: 0.98  RIE: 12.27  Area under accumulation curve: 0.97  Ave. Number of outranking decoys: 20  Minimum Tc over all active pairs: 0.0093 | | |
| --- | --- | --- |
| **Count and percentage of actives in top N% of decoy results.**  % Decoys | 1%| 2%| 5%| 10%| 20%|  # Actives | 4| 12| 25| 25| 25|  % Actives | 16.0| 48.0| 100.0| 100.0| 100.0| | | |
| **Count and percentage of actives in top N% of results.**  % Results | 1%| 2%| 5%| 10%| 20%|  # Actives | 4| 6| 25| 25| 25|  % Actives | 16.0| 24.0|100.0| 100.0| 100.0| | | |
| **1-Specificity** | **Sensitivity** | **%Screen** |
| 0.96  0.92  0.88  0.84  0.8  0.76  0.72  0.68  0.64  0.6  0.56  0.52  0.48  0.44  0.4  0.36  0.32  0.28  0.24  0.2  0.16  0.12  0.08  0.04  0 | 0.04  0.08  0.12  0.16  0.2  0.24  0.28  0.32  0.36  0.4  0.44  0.48  0.52  0.56  0.6  0.64  0.68  0.72  0.76  0.8  0.84  0.88  0.92  0.96  1 | 0.156862745  0.392156863  0.470588235  0.62745098  1.647058824  1.725490196  2.352941176  2.431372549  2.588235294  2.666666667  2.745098039  2.823529412  2.980392157  3.058823529  3.137254902  3.215686275  3.294117647  3.37254902  3.450980392  3.529411765  3.607843137  3.68627451  3.764705882  3.843137255  3.921568627 |

**Table 2:** Results of the QSAR model, Test and Train Dataset for the QSAR model

| S.D. R^2 RMSE Q^2  0.6427 0.7123 0.7338 0.6223 |
| --- |
| ID Set Y(Obs) Y(Pred) Error Name |
| 1 train 4.8800 5.7227 0.8427 CHEMBL400239 |
| 2 train 7.4700 6.5353 -0.9347 CHEMBL442802 |
| 3 train 7.3900 9.0828 1.6928 CHEMBL186290 |
| 4 test 8.9600 9.0255 0.0655 CHEMBL362558 |
| 5 train 4.9700 5.0129 0.0429 CHEMBL4065388 |
| 6 train 4.8200 5.2340 0.4140 CHEMBL4087456 |
| 7 test 5.8600 5.8129 -0.0471 CHEMBL1270230 |
| 8 train 4.9700 6.1570 1.1870 CHEMBL403404 |
| 9 test 4.3000 5.0520 0.7520 CHEMBL105712 |
| 10 test 7.8900 7.1753 -0.7147 CHEMBL331190 |
| 11 test 4.5700 5.3096 0.7396 CHEMBL78264 |
| 12 test 7.9000 7.0010 -0.8990 CHEMBL66900 |
| 13 train 4.5400 6.2484 1.7084 CHEMBL290436 |
| 14 train 7.4000 7.0574 -0.3426 CHEMBL302490 |
| 15 train 6.0500 6.0633 0.0133 CHEMBL431634 |
| 16 train 4.9200 6.9230 2.0030 CHEMBL120355 |
| 17 train 5.2000 6.6253 1.4253 CHEMBL442363 |
| 18 test 6.6300 5.9356 -0.6944 CHEMBL4450851 |
| 19 train 8.3800 6.4029 -1.9771 CHEMBL2094331 |
| 20 train 4.8900 5.9992 1.1092 CHEMBL4436958 |
| 21 train 8.0800 7.9012 -0.1788 CHEMBL102714 |
| 22 train 5.6200 5.4658 -0.1542 CHEMBL3915489 |
| 23 train 5.2600 5.4011 0.1411 CHEMBL3890986 |
| 24 test 6.6800 5.1562 -1.5238 CHEMBL3914252 |
| 25 test 5.6800 5.6645 -0.0155 CHEMBL3899197 |
| 26 train 5.4700 5.2254 -0.2446 CHEMBL3966595 |
| 27 train 7.9200 8.2341 0.3141 CHEMBL6041961 |
| 28 train 7.9200 8.2341 0.3141 CHEMBL6041961 |
| 29 train 7.3500 7.1181 -0.2319 CHEMBL3735835 |
| 30 test 7.3500 7.1181 -0.2319 CHEMBL3735835 |
| 31 train 5.8600 5.9415 0.0815 CHEMBL3734985 |
| 32 train 5.8600 5.9415 0.0815 CHEMBL3734985 |
| 33 test 4.6400 5.2311 0.5911 CHEMBL414128 |
| 34 train 5.0700 5.1116 0.0416 CHEMBL399696 |
| 35 train 4.9800 5.2512 0.2712 CHEMBL403562 |
| 36 train 6.6100 6.2698 -0.3402 CHEMBL248219 |
| 37 train 6.3000 6.4836 0.1836 CHEMBL251375 |
| 38 test 5.5500 6.4211 0.8711 CHEMBL249531 |
| 39 train 7.6800 8.0574 0.3774 CHEMBL4071773 |
| 40 train 5.3200 5.7518 0.4318 CHEMBL4077010 |
| 41 train 6.9200 7.4673 0.5473 CHEMBL3398204 |
| 42 train 5.7500 5.8832 0.1332 CHEMBL1938954 |
| 43 train 6.1100 6.2190 0.1090 CHEMBL1669585 |
| 44 train 5.7200 5.2837 -0.4363 CHEMBL464381 |
| 45 train 5.7200 5.2203 -0.4997 CHEMBL464381 |
| 46 train 6.8500 6.8166 -0.0334 CHEMBL261720 |
| 47 train 7.4300 6.9603 -0.4697 CHEMBL1940906 |
| 48 train 5.2000 5.3064 0.1064 CHEMBL1938963 |
| 49 train 4.3000 5.3067 1.0067 CHEMBL1081198 |
| 50 train 5.1800 4.0677 -1.1123 CHEMBL5071369 |
| 51 train 6.7000 6.2183 -0.4817 CHEMBL318471 |
| 52 train 5.9200 6.7295 0.8095 CHEMBL574233 |
| 53 train 6.4700 6.6183 0.1483 CHEMBL1940252 |
| 54 train 6.6000 5.9874 -0.6126 CHEMBL233149 |
| 55 train 6.1400 7.0573 0.9173 CHEMBL1630477 |
| 56 train 6.7000 6.7812 0.0812 CHEMBL3398205 |
| 57 train 6.3200 6.4383 0.1183 CHEMBL3398190 |
| 58 train 6.2200 6.4890 0.2690 CHEMBL318911 |
| 59 train 6.3000 6.2082 -0.0918 CHEMBL98501 |
| 60 train 7.5800 7.8091 0.2291 CHEMBL336179 |
| 61 train 5.6800 5.3861 -0.2939 CHEMBL316485 |
| 62 train 6.8700 7.8091 0.9391 CHEMBL131035 |
| 63 test 7.4600 7.0795 -0.3805 CHEMBL574591 |
| 64 test 6.7000 7.1259 0.4259 CHEMBL573480 |
| 65 train 6.1700 7.5412 1.3712 CHEMBL574600 |
| 66 test 7.4700 7.0795 -0.3905 CHEMBL574588 |
| 67 train 7.7000 7.1124 -0.5876 CHEMBL574613 |
| 68 train 6.1900 5.8686 -0.3214 CHEMBL75680 |
| 69 train 7.6600 7.8091 0.1491 CHEMBL340259 |
| 70 train 5.6000 5.6677 0.0677 CHEMBL142824 |
| 71 train 4.6600 4.6284 -0.0316 CHEMBL178179 |
| 72 test 6.6100 6.8998 0.2898 CHEMBL4868956 |
| 73 train 7.1100 7.1728 0.0628 CHEMBL4865061 |
| 74 train 5.4100 6.4376 1.0276 CHEMBL596073 |
| 75 train 5.4100 6.4376 1.0276 CHEMBL596073 |
| 76 test 7.6000 8.6777 1.0777 CHEMBL469509 |
| 77 train 6.7000 6.9333 0.2333 CHEMBL569998 |
| 78 train 5.7000 5.7028 0.0028 CHEMBL296271 |
| 79 train 5.2600 5.6895 0.4295 CHEMBL444169 |
| 80 train 6.8000 6.7427 -0.0573 CHEMBL573933 |
| 81 train 6.7500 7.1525 0.4025 CHEMBL573192 |
| 82 train 8.1500 7.8944 -0.2556 CHEMBL3410104 |
| 83 test 5.3000 5.9824 0.6824 CHEMBL316512 |
| 84 test 5.0000 5.5159 0.5159 CHEMBL99779 |
| 85 train 4.5200 6.6648 2.1448 CHEMBL572922 |
| 86 train 7.6000 7.1523 -0.4477 CHEMBL3652551 |
| 87 train 6.9600 7.4916 0.5316 CHEMBL319265 |
| 88 test 6.0000 5.3652 -0.6348 CHEMBL140061 |
| 89 train 6.5200 6.4572 -0.0628 CHEMBL461139 |
| 90 train 5.0000 5.3332 0.3332 CHEMBL142764 |
| 91 train 4.3000 5.0520 0.7520 CHEMBL105712 |
| 92 train 5.0000 4.5854 -0.4146 CHEMBL403233 |
| 93 train 9.2200 8.4977 -0.7223 CHEMBL1082152 |
| 94 train 7.6600 7.7279 0.0679 CHEMBL1087243 |
| 95 train 8.6200 7.7814 -0.8386 CHEMBL1088149 |
| 96 test 7.1100 7.0801 -0.0299 CHEMBL322970 |
| 97 train 9.0000 8.5967 -0.4033 CHEMBL1082151 |
| 98 train 7.4600 7.4855 0.0255 CHEMBL1081128 |
| 99 test 6.3900 6.5449 0.1549 CHEMBL402228 |
| 100 train 5.1500 5.3635 0.2135 CHEMBL26241 |
| 101 test 5.7300 5.5510 -0.1790 CHEMBL512208 |
| 102 test 6.3700 6.1852 -0.1848 CHEMBL261439 |
| 103 train 6.2800 6.2485 -0.0315 CHEMBL408634 |
| 104 train 7.6800 6.9330 -0.7470 CHEMBL407730 |
| 105 test 7.6800 6.9330 -0.7470 CHEMBL407730 |
| 106 train 6.3700 6.7176 0.3476 CHEMBL260344 |
| 107 train 6.3700 6.7176 0.3476 CHEMBL260344 |
| 108 train 8.1500 8.1493 -0.0007 CHEMBL264161 |
| 109 test 8.1500 8.1493 -0.0007 CHEMBL264161 |
| 110 train 6.8500 6.6466 -0.2034 CHEMBL101804 |
| 111 train 6.8500 6.6466 -0.2034 CHEMBL101804 |
| 112 train 7.6200 7.4858 -0.1342 CHEMBL427909 |
| 113 test 7.6200 7.4858 -0.1342 CHEMBL427909 |
| 114 train 8.1500 7.6329 -0.5171 CHEMBL259838 |
| 115 train 8.1500 7.6329 -0.5171 CHEMBL259838 |
| 116 test 7.6600 7.1133 -0.5467 CHEMBL259744 |
| 117 test 7.1500 7.1967 0.0467 CHEMBL347681 |
| 118 test 6.3200 6.6309 0.3109 CHEMBL160829 |
| 119 test 7.1200 6.5307 -0.5893 CHEMBL156987 |
| 120 test 7.2800 7.3847 0.1047 CHEMBL158885 |
| 121 train 6.8600 6.8980 0.0380 CHEMBL157089 |
| 122 train 6.9400 6.6170 -0.3230 CHEMBL156277 |
| 123 train 7.1300 6.9715 -0.1585 CHEMBL345212 |
| 124 train 6.4300 7.0977 0.6677 CHEMBL160937 |
| 125 train 6.1500 6.5555 0.4055 CHEMBL350435 |
| 126 train 6.5200 6.1554 -0.3646 CHEMBL351356 |
| 127 train 6.2300 5.8751 -0.3549 CHEMBL346551 |
| 128 train 7.4700 7.4469 -0.0231 CHEMBL337642 |
| 129 train 6.7200 6.9138 0.1938 CHEMBL7463 |
| 130 test 5.1700 6.1542 0.9842 CHEMBL1164353 |
| 131 train 5.1700 6.1542 0.9842 CHEMBL1164353 |
| 132 train 6.5100 5.8569 -0.6531 CHEMBL5271833 |
| 133 test 8.0500 7.7106 -0.3394 CHEMBL5284249 |
| 134 train 7.1400 7.3467 0.2067 CHEMBL5290908 |
| 135 test 8.5200 8.1011 -0.4189 CHEMBL5266186 |
| 136 train 8.7400 8.8137 0.0737 CHEMBL5266570 |
| 137 test 8.3800 8.6984 0.3184 CHEMBL5276840 |
| 138 train 8.3900 7.9385 -0.4515 CHEMBL5271312 |
| 139 train 5.9800 5.6922 -0.2878 CHEMBL403406 |
| 140 train 6.3500 5.9873 -0.3627 CHEMBL400240 |
| 141 test 5.4500 6.5567 1.1067 CHEMBL249141 |
| 142 test 5.7500 6.1626 0.4126 CHEMBL399287 |
| 143 train 4.0000 4.5029 0.5029 CHEMBL449317 |
| 144 test 5.1100 6.1265 1.0165 CHEMBL2312654 |
| 145 train 4.5200 5.0784 0.5584 CHEMBL2312645 |
| 146 train 6.7000 6.3124 -0.3876 CHEMBL316940 |
| 147 train 6.5200 6.6409 0.1209 CHEMBL99803 |
| 148 train 7.3200 7.0805 -0.2395 CHEMBL599428 |
| 149 train 6.0000 5.2930 -0.7070 CHEMBL341572 |
| 150 train 8.8300 7.8787 -0.9513 CHEMBL2203552 |
| 151 train 7.2800 8.5631 1.2831 CHEMBL369572 |
| 152 test 6.9600 8.8518 1.8918 CHEMBL361948 |
| 153 train 4.7700 5.8365 1.0665 CHEMBL111895 |
| 154 test 6.9200 6.8417 -0.0783 CHEMBL329063 |
| 155 train 7.0500 6.7705 -0.2795 CHEMBL333894 |
| 156 test 7.1000 6.0649 -1.0351 CHEMBL1230607 |
| 157 train 7.1000 6.0649 -1.0351 CHEMBL1230607 |
| 158 train 6.4000 5.9749 -0.4251 CHEMBL308293 |
| 159 train 5.2300 5.0330 -0.1970 CHEMBL306355 |
| 160 train 7.9200 6.7826 -1.1374 CHEMBL1097003 |
| 161 test 7.9200 6.7826 -1.1374 CHEMBL1097003 |
| 162 train 5.9600 5.4132 -0.5468 CHEMBL77066 |
| 163 test 5.2100 4.4952 -0.7148 CHEMBL218301 |
| 164 test 5.5900 5.2837 -0.3063 CHEMBL464381 |
| 165 train 5.5900 5.2203 -0.3697 CHEMBL464381 |
| 166 test 6.1000 6.0836 -0.0164 CHEMBL483841 |
| 167 train 9.0700 7.7687 -1.3013 CHEMBL1940981 |
| 168 train 5.1000 4.9314 -0.1686 CHEMBL341655 |
| 169 test 5.4000 6.3643 0.9643 CHEMBL99280 |
| 170 train 6.8900 6.9202 0.0302 CHEMBL317964 |
| 171 train 7.6200 7.1131 -0.5069 CHEMBL98153 |
| 172 train 6.0000 5.2930 -0.7070 CHEMBL341572 |
| 173 train 6.1800 5.9871 -0.1929 CHEMBL559472 |
| 174 train 4.9100 5.6244 0.7144 CHEMBL559241 |
| 175 train 5.8900 5.6574 -0.2326 CHEMBL260358 |
| 176 train 5.8900 5.6574 -0.2326 CHEMBL260358 |
| 177 train 6.2300 5.5754 -0.6546 CHEMBL406863 |
| 178 test 6.5500 5.2065 -1.3435 CHEMBL256517 |
| 179 train 4.5100 4.9532 0.4432 CHEMBL563143 |
| 180 train 7.0300 6.3418 -0.6882 CHEMBL470566 |
| 181 train 5.0000 4.7462 -0.2538 CHEMBL24693 |
| 182 train 7.1900 7.0876 -0.1024 CHEMBL456218 |
| 183 train 8.0800 8.3716 0.2916 CHEMBL471832 |
| 184 test 6.7700 6.9752 0.2052 CHEMBL1210406 |
| 185 train 6.7700 6.9752 0.2052 CHEMBL1210406 |
| 186 train 5.7000 5.8337 0.1337 CHEMBL5182770 |
| 187 train 5.5200 5.1913 -0.3287 CHEMBL342402 |
| 188 test 6.0900 5.9113 -0.1787 CHEMBL40021 |
| 189 train 6.1700 6.5446 0.3746 CHEMBL603197 |
| 190 train 6.1700 6.5446 0.3746 CHEMBL603197 |
| 191 train 7.5700 7.1274 -0.4426 CHEMBL3091547 |
| 192 train 9.8000 9.0625 -0.7375 CHEMBL5284020 |
| 193 train 8.1600 7.6311 -0.5289 CHEMBL5281994 |
| 194 train 8.3900 8.4011 0.0111 CHEMBL5272462 |
| 195 train 7.4200 7.3784 -0.0416 CHEMBL3093033 |
| 196 train 5.0100 5.9835 0.9735 CHEMBL3093045 |
| 197 train 5.7500 6.2918 0.5418 CHEMBL3093039 |
| 198 train 5.7500 6.2918 0.5418 CHEMBL3093039 |
| 199 train 6.6600 7.8091 1.1491 CHEMBL340259 |
| 200 train 7.4600 7.2218 -0.2382 CHEMBL119963 |
| 201 train 8.4000 7.5435 -0.8565 CHEMBL321315 |
| 202 test 5.2500 6.3792 1.1292 CHEMBL270262 |
| 203 test 6.8600 7.3296 0.4695 CHEMBL334555 |
| 204 test 7.2900 7.8091 0.5191 CHEMBL130774 |
| 205 train 5.8400 6.3339 0.4939 CHEMBL6012976 |
| 206 train 7.3700 7.4916 0.1216 CHEMBL103628 |
| 207 test 8.7000 8.4349 -0.2651 CHEMBL412142 |
| 208 train 8.7000 8.4349 -0.2651 CHEMBL412142 |
| 209 train 6.8000 7.2444 0.4444 CHEMBL388978 |
| 210 train 5.0000 5.5159 0.5159 CHEMBL99779 |
| 211 train 6.0100 5.2276 -0.7824 CHEMBL203569 |
| 212 train 8.4000 7.9404 -0.4596 CHEMBL66453 |
| 213 train 5.6800 5.3861 -0.2939 CHEMBL316485 |
| 214 train 5.0000 5.5159 0.5159 CHEMBL99779 |
| 215 train 7.5500 6.8027 -0.7473 CHEMBL599224 |
| 216 train 6.4500 6.5508 0.1008 CHEMBL597754 |
| 217 train 7.4200 6.9612 -0.4588 CHEMBL578628 |
| 218 train 7.3000 7.2330 -0.0670 CHEMBL573257 |
| 219 test 7.1300 6.8769 -0.2531 CHEMBL573486 |
| 220 train 7.1100 6.9770 -0.1330 CHEMBL582853 |
| 221 train 6.5500 7.1508 0.6008 CHEMBL578861 |
| 222 train 7.8900 7.4874 -0.4025 CHEMBL584976 |
| 223 train 6.8900 5.8766 -1.0134 CHEMBL2062563 |
| 224 train 6.5500 6.5375 -0.0125 CHEMBL594523 |
| 225 train 6.5500 6.5375 -0.0125 CHEMBL594523 |
| 226 train 8.4000 7.6072 -0.7928 CHEMBL50894 |
| 227 train 7.1000 7.3762 0.2762 CHEMBL1095366 |
| 228 train 7.1000 7.3762 0.2762 CHEMBL1095366 |
| 229 train 5.5700 6.2286 0.6586 CHEMBL1095038 |
| 230 train 5.5700 6.2286 0.6586 CHEMBL1095038 |
| 231 test 4.5400 5.8632 1.3232 CHEMBL40022 |
| 232 train 6.1100 6.6459 0.5359 CHEMBL1210405 |
| 233 test 6.1100 6.6459 0.5359 CHEMBL1210405 |
| 234 train 6.5700 6.1935 -0.3765 CHEMBL571486 |
| 235 train 5.4000 6.9531 1.5531 CHEMBL67241 |
| 236 train 6.2700 5.8427 -0.4273 CHEMBL1630448 |
| 237 test 6.0100 6.0718 0.0618 CHEMBL1630460 |
| 238 train 7.6800 6.9453 -0.7347 CHEMBL5282740 |
| 239 train 8.9200 8.5504 -0.3696 CHEMBL1235645 |
| 240 train 8.9200 8.5504 -0.3696 CHEMBL1235645 |
| 241 test 5.8600 5.5604 -0.2996 CHEMBL1630431 |
| 242 test 7.9700 6.5701 -1.3999 CHEMBL1630434 |
| 243 train 7.9700 6.5701 -1.3999 CHEMBL1630434 |
| 244 train 6.7000 6.8031 0.1031 CHEMBL1086780 |
| 245 train 6.7000 6.8031 0.1031 CHEMBL1086780 |
| 246 train 5.3000 5.3951 0.0951 CHEMBL1084681 |
| 247 train 5.3000 5.3951 0.0951 CHEMBL1084681 |
| 248 train 5.1400 5.5959 0.4559 CHEMBL1077258 |
| 249 train 5.1400 5.5959 0.4559 CHEMBL1077258 |
| 250 train 4.6900 5.7717 1.0817 CHEMBL1084693 |
| 251 train 4.6900 5.7717 1.0817 CHEMBL1084693 |
| 252 train 5.7900 6.3801 0.5901 CHEMBL5402554 |
| 253 train 5.4900 6.2199 0.7299 CHEMBL5410239 |
| 254 train 6.4000 6.7544 0.3544 CHEMBL334031 |
| 255 test 6.8000 6.4577 -0.3423 CHEMBL1809120 |
| 256 train 7.0400 6.4369 -0.6031 CHEMBL570580 |
| 257 train 8.2100 7.3309 -0.8791 CHEMBL1682851 |
| 258 train 5.6600 6.5222 0.8622 CHEMBL95827 |
| 259 train 5.5700 6.0728 0.5028 CHEMBL1096290 |
| 260 train 7.1000 6.5765 -0.5235 CHEMBL1098938 |
| 261 test 6.4000 6.6251 0.2251 CHEMBL419054 |
| 262 test 7.2100 6.8087 -0.4013 CHEMBL1682839 |
| 263 test 7.7700 7.3296 -0.4404 CHEMBL340935 |
| 264 train 8.1500 7.9012 -0.2488 CHEMBL102714 |
| 265 train 6.4100 6.6735 0.2635 CHEMBL288064 |
| 266 train 7.6000 7.8340 0.2340 CHEMBL103055 |
| 267 test 6.2700 5.5920 -0.6780 CHEMBL458210 |
| 268 train 7.1600 7.6794 0.5194 CHEMBL4076038 |
| 269 train 7.1500 7.9329 0.7829 CHEMBL106061 |
| 270 train 7.9000 6.8795 -1.0205 CHEMBL1809117 |
| 271 train 6.5000 6.5843 0.0843 CHEMBL1809121 |
| 272 train 6.5000 5.9493 -0.5507 CHEMBL1809122 |
| 273 test 7.7000 6.1788 -1.5212 CHEMBL1809109 |
| 274 train 6.4000 6.5798 0.1798 CHEMBL1809110 |
| 275 test 7.1000 7.3551 0.2551 CHEMBL1809113 |
| 276 train 5.4000 6.2050 0.8050 CHEMBL1809116 |
| 277 test 5.2000 6.5843 1.3843 CHEMBL1809121 |
| 278 train 5.7200 5.2837 -0.4363 CHEMBL464381 |
| 279 test 5.7200 5.2203 -0.4997 CHEMBL464381 |
| 280 test 4.1100 4.6720 0.5620 CHEMBL2207938 |
| 281 test 4.4000 5.0247 0.6247 CHEMBL2334799 |
| 282 test 8.8900 8.8442 -0.0458 CHEMBL178737 |
| 283 train 5.9200 5.9269 0.0069 CHEMBL175845 |
| 284 train 7.0000 6.9755 -0.0245 CHEMBL319373 |
| 285 test 6.0600 6.3936 0.3336 CHEMBL565612 |
| 286 train 4.6300 6.1587 1.5287 CHEMBL5424881 |
| 287 test 4.7000 5.8447 1.1447 CHEMBL5402529 |
| 288 train 6.9200 6.9559 0.0359 CHEMBL5398463 |
| 289 train 5.1200 4.8506 -0.2694 CHEMBL405384 |
| 290 train 4.8200 6.1184 1.2984 CHEMBL104264 |
| 291 train 7.2800 7.5412 0.2612 CHEMBL1232916 |
| 292 train 9.0500 7.9078 -1.1422 CHEMBL5415012 |
| 293 test 9.3500 9.3254 -0.0246 CHEMBL5438689 |
| 294 test 8.4100 8.5707 0.1607 CHEMBL5434336 |
| 295 train 9.6000 9.2616 -0.3384 CHEMBL5407971 |
| 296 train 9.8200 9.8233 0.0033 CHEMBL5404581 |
| 297 train 7.7000 8.1219 0.4219 CHEMBL5434002 |
| 298 train 4.8500 4.9881 0.1381 CHEMBL38043 |
| 299 test 5.6200 5.9927 0.3727 CHEMBL404689 |
| 300 train 7.6400 6.6056 -1.0344 CHEMBL253956 |
| 301 train 7.8900 7.1025 -0.7875 CHEMBL402541 |
| 302 train 8.7400 8.3271 -0.4129 CHEMBL54547 |
| 303 train 5.7700 6.3235 0.5535 CHEMBL3110134 |
| 304 train 5.4700 6.4648 0.9948 CHEMBL256559 |
| 305 train 9.1300 9.6054 0.4754 CHEMBL5428013 |
| 306 train 7.5200 7.2394 -0.2806 CHEMBL403405 |
| 307 train 6.0800 6.4626 0.3826 CHEMBL482632 |
| 308 test 8.2700 8.7358 0.4658 CHEMBL522464 |
| 309 train 7.2600 7.9692 0.7092 CHEMBL489410 |
| 310 train 6.0800 6.2278 0.1478 CHEMBL261660 |
| 311 test 6.0800 6.2278 0.1478 CHEMBL261660 |
| 312 test 7.3700 7.0281 -0.3419 CHEMBL406701 |
| 313 train 7.3700 7.0281 -0.3419 CHEMBL406701 |
| 314 train 7.8500 7.8359 -0.0141 CHEMBL317657 |
| 315 train 7.8500 7.8359 -0.0141 CHEMBL317657 |
| 316 train 7.4100 6.9198 -0.4902 CHEMBL540245 |
| 317 train 7.1900 6.9088 -0.2812 CHEMBL557354 |
| 318 train 6.8000 6.8697 0.0697 CHEMBL557273 |
| 319 train 6.0600 6.7194 0.6594 CHEMBL521774 |
| 320 train 6.6300 7.2307 0.6007 CHEMBL491064 |
| 321 train 9.1400 8.8711 -0.2689 CHEMBL490636 |
| 322 train 7.9900 8.3774 0.3874 CHEMBL490637 |
| 323 train 4.8700 4.9152 0.0452 CHEMBL460627 |
| 324 test 5.6800 5.6383 -0.0417 CHEMBL3734776 |
| 325 train 5.6800 5.6383 -0.0417 CHEMBL3734776 |
| 326 train 5.9200 6.4084 0.4884 CHEMBL1099281 |
| 327 train 5.9600 6.1391 0.1791 CHEMBL1096634 |
| 328 train 5.9800 6.1391 0.1591 CHEMBL1096626 |
| 329 train 6.0300 6.1620 0.1320 CHEMBL1083208 |
| 330 test 6.0300 6.1620 0.1320 CHEMBL1083208 |
| 331 train 5.4200 5.8513 0.4313 CHEMBL1095039 |
| 332 train 5.4200 5.8513 0.4313 CHEMBL1095039 |
| 333 train 7.6400 7.2980 -0.3420 CHEMBL1091083 |
| 334 train 7.6400 7.2980 -0.3420 CHEMBL1091083 |
| 335 train 7.2600 6.9595 -0.3005 CHEMBL1093745 |
| 336 train 7.2600 6.9595 -0.3005 CHEMBL1093745 |
| 337 train 5.9900 6.3183 0.3283 CHEMBL1098241 |
| 338 test 6.5200 6.2015 -0.3185 CHEMBL1098316 |
| 339 train 4.7800 6.2017 1.4217 CHEMBL1085920 |
| 340 train 7.3800 7.4433 0.0633 CHEMBL523113 |
| 341 test 6.1500 7.1317 0.9817 CHEMBL483465 |
| 342 train 9.6400 8.4320 -1.2080 CHEMBL491647 |
| 343 train 8.9200 8.4451 -0.4749 CHEMBL490842 |
| 344 test 6.5000 7.1947 0.6947 CHEMBL306692 |
| 345 train 5.4000 4.9911 -0.4089 CHEMBL24537 |
| 346 train 5.1700 4.8967 -0.2733 CHEMBL5438325 |
| 347 train 5.4300 5.6575 0.2275 CHEMBL5409693 |
| 348 test 5.4300 6.2206 0.7906 CHEMBL5394513 |
| 349 train 6.9200 6.4141 -0.5059 CHEMBL5414801 |
| 350 test 5.2300 5.2452 0.0152 CHEMBL5412372 |
| 351 train 5.8500 5.5244 -0.3256 CHEMBL284861 |
| 352 test 4.1300 5.0506 0.9206 CHEMBL2334791 |
| 353 train 5.7000 6.8734 1.1734 CHEMBL69526 |
| 354 test 6.0000 5.0948 -0.9052 CHEMBL307941 |
| 355 train 7.8500 6.4726 -1.3774 CHEMBL396614 |
| 356 train 5.2400 5.2793 0.0393 CHEMBL4093852 |
| 357 test 6.8700 7.0116 0.1416 CHEMBL3699443 |
| 358 train 7.6000 6.9981 -0.6019 CHEMBL3093054 |
| 359 train 7.4100 6.7345 -0.6755 CHEMBL3093049 |
| 360 train 6.7000 6.0691 -0.6309 CHEMBL404174 |
| 361 train 7.3500 7.0506 -0.2994 CHEMBL109944 |
| 362 train 7.4600 7.1124 -0.3476 CHEMBL574159 |
| 363 test 7.2700 7.1553 -0.1147 CHEMBL576183 |
| 364 test 7.1400 7.2067 0.0667 CHEMBL572793 |
| 365 train 7.8500 8.4373 0.5873 CHEMBL5286727 |
| 366 train 7.0600 7.0970 0.0370 CHEMBL4439321 |
| 367 train 5.2300 4.8952 -0.3348 CHEMBL1170126 |
| 368 test 5.7000 6.2569 0.5569 CHEMBL3545157 |
| 369 train 8.3000 6.4809 -1.8191 CHEMBL1276127 |
| 370 train 6.9600 6.1153 -0.8447 CHEMBL4074938 |
| 371 test 5.6000 5.1913 -0.4087 CHEMBL342402 |
| 372 train 4.6000 5.1350 0.5350 CHEMBL343821 |
| 373 train 5.7000 5.5657 -0.1343 CHEMBL143273 |
| 374 train 6.3000 5.4879 -0.8121 CHEMBL357136 |
| 375 train 5.3000 5.0666 -0.2334 CHEMBL356459 |
| 376 train 5.3400 5.6887 0.3487 CHEMBL1230165 |
| 377 train 5.5100 6.2852 0.7752 CHEMBL5081787 |
| 378 train 6.8000 6.9347 0.1347 CHEMBL4873449 |
| 379 train 6.8000 6.9347 0.1347 CHEMBL4873449 |
| 380 train 9.3000 7.9659 -1.3341 CHEMBL4095848 |
| 381 test 6.5500 6.6585 0.1085 CHEMBL326705 |
| 382 train 6.5500 6.6585 0.1085 CHEMBL326705 |
| 383 test 4.5100 5.6751 1.1651 CHEMBL4102903 |
| 384 test 4.9000 5.6962 0.7962 CHEMBL4098364 |
| 385 test 6.4800 6.4801 0.0001 CHEMBL2158866 |
| 386 train 6.0000 5.8138 -0.1862 CHEMBL458857 |
| 387 train 4.8900 6.0433 1.1533 CHEMBL2347086 |
| 388 train 5.2200 5.4736 0.2536 CHEMBL417835 |
| 389 train 4.8000 5.0422 0.2422 CHEMBL4090889 |
| 390 test 6.8300 6.9169 0.0869 CHEMBL1092802 |
| 391 train 6.8300 6.9169 0.0869 CHEMBL1092802 |
| 392 train 7.0100 7.2827 0.2727 CHEMBL1077243 |
| 393 train 7.0100 7.2827 0.2727 CHEMBL1077243 |
| 394 test 5.7600 6.7735 1.0135 CHEMBL1093746 |
| 395 train 5.7600 6.7735 1.0135 CHEMBL1093746 |
| 396 train 5.2600 5.9745 0.7145 CHEMBL1084683 |
| 397 test 5.2600 5.9745 0.7145 CHEMBL1084683 |
| 398 test 4.9600 6.2115 1.2515 CHEMBL1085918 |
| 399 train 4.9600 6.2115 1.2515 CHEMBL1085918 |
| 400 train 4.6000 6.0326 1.4326 CHEMBL1083528 |
| 401 train 4.6000 6.0326 1.4326 CHEMBL1083528 |
| 402 train 6.8000 7.0733 0.2733 CHEMBL294592 |
| 403 test 5.7000 5.6360 -0.0640 CHEMBL3765061 |
| 404 train 5.7000 5.5616 -0.1384 CHEMBL3765061 |
| 405 train 5.7000 5.5616 -0.1384 CHEMBL3765061 |
| 406 train 6.4400 6.0876 -0.3524 CHEMBL3734911 |
| 407 test 6.4400 6.0876 -0.3524 CHEMBL3734911 |
| 408 train 6.2900 5.7993 -0.4907 CHEMBL3735863 |
| 409 train 6.2900 5.7993 -0.4907 CHEMBL3735863 |
| 410 train 7.3500 6.7821 -0.5679 CHEMBL3735079 |
| 411 train 7.3500 6.7821 -0.5679 CHEMBL3735079 |
| 412 test 7.2800 7.0215 -0.2585 CHEMBL3735627 |
| 413 train 7.2800 7.0215 -0.2585 CHEMBL3735627 |
| 414 train 7.7700 7.3049 -0.4651 CHEMBL3735856 |
| 415 train 7.7700 7.3049 -0.4651 CHEMBL3735856 |
| 416 train 8.0200 7.6096 -0.4104 CHEMBL3735176 |
| 417 train 8.0200 7.6096 -0.4104 CHEMBL3735176 |
| 418 train 7.2700 6.3418 -0.9282 CHEMBL470360 |
| 419 test 6.7000 6.6563 -0.0437 CHEMBL513040 |
| 420 train 6.5500 6.5364 -0.0136 CHEMBL470567 |
| 421 train 7.0400 6.8630 -0.1770 CHEMBL469736 |
| 422 test 8.4600 8.1245 -0.3355 CHEMBL471833 |
| 423 train 4.9900 4.5854 -0.4046 CHEMBL403233 |
| 424 test 8.1500 7.6843 -0.4657 CHEMBL408564 |
| 425 train 8.1500 7.6843 -0.4657 CHEMBL408564 |
| 426 test 7.5200 7.6371 0.1171 CHEMBL396327 |
| 427 test 9.1000 8.3595 -0.7405 CHEMBL178766 |
| 428 test 4.9700 7.5056 2.5356 CHEMBL2203563 |
| 429 train 7.8000 7.3128 -0.4872 CHEMBL2203556 |
| 430 train 7.4400 6.1303 -1.3097 CHEMBL5434004 |
| 431 test 5.3700 5.7865 0.4165 CHEMBL95477 |
| 432 test 6.6200 6.7559 0.1359 CHEMBL334084 |
| 433 train 5.8900 5.1068 -0.7832 CHEMBL50498 |
| 434 test 4.8700 5.6622 0.7922 CHEMBL559040 |
| 435 train 7.2500 7.2444 -0.0056 CHEMBL388978 |
| 436 train 6.5200 6.2507 -0.2693 CHEMBL383104 |
| 437 train 6.5200 6.2507 -0.2693 CHEMBL383104 |
| 438 test 5.6500 6.1267 0.4767 CHEMBL562814 |
| 439 train 5.7500 5.5295 -0.2205 CHEMBL564437 |
| 440 train 6.7000 7.2444 0.5444 CHEMBL388978 |
| 441 train 7.1400 5.9144 -1.2256 CHEMBL5436993 |
| 442 test 7.8500 6.3155 -1.5345 CHEMBL5397959 |
| 443 train 7.2900 6.8311 -0.4589 CHEMBL5440008 |
| 444 train 7.3600 6.9671 -0.3929 CHEMBL5439156 |
| 445 test 4.8200 5.1465 0.3265 CHEMBL259141 |
| 446 train 5.8500 5.8583 0.0083 CHEMBL260000 |
| 447 test 8.8000 8.8682 0.0682 CHEMBL362814 |
| 448 test 5.1700 5.7240 0.5540 CHEMBL77947 |
| 449 train 6.0900 6.8118 0.7218 CHEMBL4100916 |
| 450 train 7.8900 6.5568 -1.3332 CHEMBL215803 |
| 451 train 5.7000 6.8647 1.1647 CHEMBL1086733 |
| 452 train 5.2300 5.1831 -0.0469 CHEMBL5400270 |
| 453 train 5.1200 5.1811 0.0611 CHEMBL5415622 |
| 454 train 6.2200 6.0299 -0.1901 CHEMBL1834110 |
| 455 test 6.3600 6.9875 0.6275 CHEMBL1834113 |
| 456 test 5.9300 6.2795 0.3495 CHEMBL428596 |
| 457 train 5.9300 6.2795 0.3495 CHEMBL428596 |
| 458 train 5.9300 6.2795 0.3495 CHEMBL428596 |
| 459 train 5.5500 4.8150 -0.7350 CHEMBL1630458 |
| 460 train 7.2800 7.1855 -0.0945 CHEMBL1630483 |
| 461 train 7.6600 6.4965 -1.1635 CHEMBL126077 |
| 462 test 5.1300 6.1180 0.9880 CHEMBL3185434 |
| 463 train 5.4400 6.0327 0.5927 CHEMBL604712 |
| 464 train 5.4400 6.0327 0.5927 CHEMBL604712 |
| 465 test 5.4200 5.2793 -0.1407 CHEMBL4096612 |
| 466 train 5.0500 4.9232 -0.1268 CHEMBL4074837 |
| 467 train 5.5100 4.9232 -0.5868 CHEMBL4095283 |
| 468 train 5.2800 5.1070 -0.1730 CHEMBL4067286 |
| 469 train 5.0700 5.1248 0.0548 CHEMBL4104341 |
| 470 test 5.0300 5.1050 0.0750 CHEMBL4066679 |
| 471 test 7.5800 6.7841 -0.7959 CHEMBL1210236 |
| 472 test 7.5800 6.7841 -0.7959 CHEMBL1210236 |
| 473 train 7.8000 6.8952 -0.9048 CHEMBL1210175 |
| 474 train 7.8000 6.8952 -0.9048 CHEMBL1210175 |
| 475 test 9.8500 7.1597 -2.6903 CHEMBL564450 |
| 476 train 8.2200 7.9329 -0.2871 CHEMBL105477 |
| 477 train 5.7000 6.0342 0.3342 CHEMBL44541 |
| 478 train 7.7500 7.8340 0.0840 CHEMBL103055 |
| 479 train 6.3000 6.6719 0.3719 CHEMBL1809107 |
| 480 train 6.9000 6.7506 -0.1494 CHEMBL1738953 |
| 481 train 6.2000 6.9782 0.7782 CHEMBL1809115 |
| 482 test 7.3200 7.4469 0.1269 CHEMBL337642 |
| 483 train 4.3000 4.6662 0.3662 CHEMBL359135 |
| 484 train 8.5200 8.1631 -0.3569 CHEMBL2048662 |
| 485 test 8.5200 8.1631 -0.3569 CHEMBL2048662 |
| 486 train 7.7700 7.7694 -0.0006 CHEMBL2046466 |
| 487 train 7.7700 7.7694 -0.0006 CHEMBL2046466 |
| 488 train 7.5700 7.6414 0.0714 CHEMBL2048668 |
| 489 test 7.5700 7.6414 0.0714 CHEMBL2048668 |
| 490 train 8.0000 7.7665 -0.2335 CHEMBL2048669 |
| 491 train 8.0000 7.7665 -0.2335 CHEMBL2048669 |
| 492 train 7.8900 7.7394 -0.1506 CHEMBL2048674 |
| 493 test 7.8900 7.7394 -0.1506 CHEMBL2048674 |
| 494 train 7.5200 7.6582 0.1382 CHEMBL2048675 |
| 495 train 7.5200 7.6582 0.1382 CHEMBL2048675 |
| 496 train 8.5200 8.3778 -0.1422 CHEMBL2048678 |
| 497 train 8.5200 8.3778 -0.1422 CHEMBL2048678 |
| 498 train 8.7000 8.6938 -0.0062 CHEMBL2048680 |
| 499 train 8.7000 8.6938 -0.0062 CHEMBL2048680 |
| 500 train 5.3000 5.5573 0.2573 CHEMBL102953 |
| 501 train 5.3000 5.7743 0.4743 CHEMBL105348 |
| 502 train 5.3500 5.7721 0.4221 CHEMBL1801632 |
| 503 test 8.4000 6.2651 -2.1349 CHEMBL430574 |
| 504 test 6.7000 6.8900 0.1900 CHEMBL121543 |
| 505 train 5.8200 6.2711 0.4511 CHEMBL328627 |
| 506 train 5.8100 5.4602 -0.3498 CHEMBL5426735 |
| 507 test 6.1800 5.7457 -0.4343 CHEMBL5417890 |
| 508 train 6.4400 6.0281 -0.4119 CHEMBL5418722 |
| 509 train 6.9900 5.5632 -1.4268 CHEMBL5441121 |
| 510 train 5.2100 5.5576 0.3476 CHEMBL5398474 |
| 511 train 6.4000 5.4715 -0.9285 CHEMBL1957100 |
| 512 train 7.7000 6.4910 -1.2090 CHEMBL1957228 |
| 513 train 5.7000 5.7668 0.0668 CHEMBL1957099 |
| 514 train 5.5000 5.4715 -0.0285 CHEMBL1957100 |
| 515 train 7.1600 7.5084 0.3484 CHEMBL1093747 |
| 516 train 7.1600 7.5084 0.3484 CHEMBL1093747 |
| 517 train 5.4700 5.7646 0.2946 CHEMBL5086263 |
| 518 test 5.3000 5.0022 -0.2978 CHEMBL5283849 |
| 519 test 7.4600 7.8121 0.3521 CHEMBL1997924 |
| 520 train 7.4600 7.8121 0.3521 CHEMBL1997924 |
| 521 train 5.9400 6.6722 0.7322 CHEMBL1096291 |
| 522 train 4.5200 6.5268 2.0068 CHEMBL1096292 |
| 523 train 5.3000 5.1829 -0.1171 CHEMBL5440511 |
| 524 train 5.2900 5.1043 -0.1857 CHEMBL5423907 |
| 525 train 5.2900 5.1070 -0.1830 CHEMBL5439392 |
| 526 train 6.2100 5.5632 -0.6468 CHEMBL5438728 |
| 527 train 7.3900 8.1819 0.7919 CHEMBL5278542 |
| 528 train 10.0000 8.5333 -1.4667 CHEMBL5268011 |
| 529 test 5.0000 6.8676 1.8676 CHEMBL5274110 |
| 530 train 6.0200 8.3425 2.3225 CHEMBL5267631 |
| 531 train 7.1100 7.3985 0.2885 CHEMBL5269649 |
| 532 train 7.0200 7.5887 0.5687 CHEMBL5272425 |
| 533 train 6.1000 7.4364 1.3364 CHEMBL5278847 |
| 534 train 7.9600 7.6076 -0.3524 CHEMBL5278701 |
| 535 train 8.3300 7.5532 -0.7768 CHEMBL5287898 |
| 536 train 8.4300 8.0261 -0.4039 CHEMBL5280241 |
| 537 train 7.2800 7.5412 0.2612 CHEMBL1232916 |
| 538 train 8.1500 7.8762 -0.2738 CHEMBL489422 |
| 539 test 6.3500 5.6766 -0.6734 CHEMBL5273659 |
| 540 train 7.4000 7.2470 -0.1530 CHEMBL3736449 |
| 541 test 7.4000 7.2470 -0.1530 CHEMBL3736449 |
| 542 train 6.5000 6.5290 0.0290 CHEMBL3735621 |
| 543 train 6.5000 6.5290 0.0290 CHEMBL3735621 |
| 544 train 5.6700 5.9262 0.2562 CHEMBL3735579 |
| 545 train 5.6700 5.9262 0.2562 CHEMBL3735579 |
| 546 train 6.0900 5.6696 -0.4204 CHEMBL3735291 |
| 547 train 6.0900 5.6696 -0.4204 CHEMBL3735291 |
| 548 train 8.3000 7.2444 -1.0556 CHEMBL388978 |
| 549 train 6.4400 6.2160 -0.2240 CHEMBL1210310 |
| 550 train 6.4400 6.2160 -0.2240 CHEMBL1210310 |
| 551 train 5.8000 6.2243 0.4243 CHEMBL1099298 |
| 552 train 5.3900 6.0520 0.6620 CHEMBL1080583 |
| 553 train 6.1800 5.9542 -0.2258 CHEMBL1086782 |
| 554 train 6.1800 5.9542 -0.2258 CHEMBL1086782 |
| 555 train 5.5400 6.2286 0.6886 CHEMBL1095038 |
| 556 train 5.5400 6.2286 0.6886 CHEMBL1095038 |
| 557 test 8.0000 7.3762 -0.6238 CHEMBL1095366 |
| 558 train 8.0000 7.3762 -0.6238 CHEMBL1095366 |
| 559 train 7.2500 7.0808 -0.1692 CHEMBL1093390 |
| 560 test 7.2500 7.0808 -0.1692 CHEMBL1093390 |
| 561 test 5.2700 6.2286 0.9586 CHEMBL1084682 |
| 562 train 5.2700 6.2286 0.9586 CHEMBL1084682 |
| 563 train 4.9800 5.8234 0.8434 CHEMBL1077282 |
| 564 train 4.9800 5.8234 0.8434 CHEMBL1077282 |
| 565 test 7.3600 6.5050 -0.8550 CHEMBL1082237 |
| 566 train 7.3600 6.5050 -0.8550 CHEMBL1082237 |
| 567 test 7.2600 6.9524 -0.3076 CHEMBL1088618 |
| 568 train 7.2600 6.9524 -0.3076 CHEMBL1088618 |
| 569 train 7.1200 6.5050 -0.6150 CHEMBL1086638 |
| 570 test 7.1200 6.5050 -0.6150 CHEMBL1086638 |
| 571 train 6.5800 6.5502 -0.0298 CHEMBL1086781 |
| 572 train 6.5800 6.5502 -0.0298 CHEMBL1086781 |
| 573 train 5.9300 6.0579 0.1279 CHEMBL1085927 |
| 574 train 5.9300 6.0579 0.1279 CHEMBL1085927 |
| 575 train 7.6600 6.7467 -0.9133 CHEMBL1091082 |
| 576 test 7.6600 6.7467 -0.9133 CHEMBL1091082 |
| 577 train 7.2600 7.5638 0.3038 CHEMBL1089722 |
| 578 train 7.2600 7.5638 0.3038 CHEMBL1089722 |
| 579 train 4.7700 5.7514 0.9814 CHEMBL1084692 |
| 580 train 4.7700 5.7514 0.9814 CHEMBL1084692 |
| 581 test 7.1700 7.5587 0.3887 CHEMBL5284964 |
| 582 train 7.0500 6.3932 -0.6568 CHEMBL3093043 |
| 583 train 5.6800 6.2724 0.5924 CHEMBL3093037 |
| 584 train 5.6800 6.2724 0.5924 CHEMBL3093037 |
| 585 train 9.6000 8.3573 -1.2427 CHEMBL4076186 |
| 586 train 7.6600 7.2821 -0.3779 CHEMBL4070244 |
| 587 test 8.7000 8.5001 -0.1999 CHEMBL4088777 |
| 588 train 7.7200 7.7797 0.0597 CHEMBL4102920 |
| 589 train 8.6600 8.4428 -0.2172 CHEMBL4074586 |
| 590 train 8.3800 7.2444 -1.1356 CHEMBL388978 |
| 591 train 5.8500 5.5244 -0.3256 CHEMBL284861 |
| 592 train 4.5700 4.4341 -0.1359 CHEMBL2207939 |
| 593 train 6.7000 6.6867 -0.0133 CHEMBL2386101 |
| 594 train 8.3200 7.5486 -0.7714 CHEMBL2386096 |
| 595 train 6.7000 6.2460 -0.4540 CHEMBL578427 |
| 596 train 6.2100 6.2651 0.0551 CHEMBL430574 |
| 597 test 6.1700 6.4214 0.2514 CHEMBL4277917 |
| 598 train 7.2000 5.7153 -1.4847 CHEMBL5278787 |
| 599 train 6.6800 6.6926 0.0126 CHEMBL456219 |
| 600 test 6.6600 7.0062 0.3462 CHEMBL470565 |
| 601 train 6.2000 6.6109 0.4109 CHEMBL471015 |
| 602 test 8.0700 8.3874 0.3174 CHEMBL472043 |
| 603 test 6.3300 6.0816 -0.2484 CHEMBL5398642 |
| 604 train 5.7800 5.8733 0.0933 CHEMBL5424946 |
| 605 train 7.2300 6.2773 -0.9527 CHEMBL5416124 |
| 606 train 5.2800 6.2040 0.9240 CHEMBL5396759 |
| 607 train 7.5000 6.8886 -0.6114 CHEMBL5426638 |
| 608 train 4.7800 4.8761 0.0961 CHEMBL252672 |
| 609 train 7.5000 6.9905 -0.5095 CHEMBL66910 |
| 610 train 4.4000 5.0118 0.6118 CHEMBL3358804 |
| 611 train 7.8900 7.8541 -0.0359 CHEMBL4095172 |
| 612 train 5.9200 7.0267 1.1067 CHEMBL4070575 |
| 613 train 7.3600 8.3573 0.9973 CHEMBL4076186 |
| 614 train 7.2700 7.5354 0.2654 CHEMBL4087402 |
| 615 train 8.4600 8.1517 -0.3083 CHEMBL4096472 |
| 616 train 5.1000 6.0389 0.9389 CHEMBL416975 |
| 617 train 5.1700 6.0598 0.8898 CHEMBL40439 |
| 618 train 5.1300 5.5081 0.3781 CHEMBL4166399 |
| 619 train 5.0600 5.7162 0.6562 CHEMBL2016642 |
| 620 train 5.9200 6.3179 0.3979 CHEMBL4539700 |
| 621 train 6.6600 7.4353 0.7753 CHEMBL4578996 |
| 622 train 6.2000 6.8238 0.6238 CHEMBL4442834 |
| 623 test 5.8200 6.3015 0.4815 CHEMBL5207871 |
| 624 train 5.1000 5.0123 -0.0877 CHEMBL306347 |
| 625 train 8.4000 7.6218 -0.7782 CHEMBL111298 |
| 626 train 6.9800 6.7077 -0.2723 CHEMBL259850 |
| 627 train 6.7500 6.6503 -0.0997 CHEMBL1940251 |
| 628 train 7.4000 7.1997 -0.2003 CHEMBL1940977 |
| 629 train 8.8500 7.8499 -1.0001 CHEMBL1940979 |
| 630 train 6.0700 6.1034 0.0334 CHEMBL4761851 |
| 631 test 6.5200 7.0773 0.5573 CHEMBL4851835 |
| 632 train 7.0900 7.1277 0.0377 CHEMBL4857955 |
| 633 train 5.3100 5.8361 0.5261 CHEMBL4849828 |
| 634 train 6.0800 7.3309 1.2509 CHEMBL1682851 |
| 635 test 4.3000 4.7252 0.4252 CHEMBL143525 |
| 636 train 6.2700 6.4122 0.1422 CHEMBL1164177 |
| 637 train 6.2700 6.4122 0.1422 CHEMBL1164177 |
| 638 train 6.4000 6.1967 -0.2033 CHEMBL3735837 |
| 639 train 6.4000 6.1967 -0.2033 CHEMBL3735837 |
| 640 train 6.4100 6.6735 0.2635 CHEMBL288064 |
| 641 train 9.2400 8.1836 -1.0564 CHEMBL1080901 |
| 642 train 6.9800 6.7077 -0.2723 CHEMBL259850 |
| 643 test 7.4400 7.1431 -0.2969 CHEMBL1241659 |
| 644 train 6.5500 6.6585 0.1085 CHEMBL326705 |
| 645 train 6.5500 6.6585 0.1085 CHEMBL326705 |
| 646 train 7.8000 7.5436 -0.2564 CHEMBL306865 |
| 647 train 6.8100 5.2704 -1.5396 CHEMBL5284219 |
| 648 train 5.2500 6.8736 1.6236 CHEMBL5289425 |
| 649 test 5.1600 4.9332 -0.2268 CHEMBL5439952 |
| 650 train 5.0300 4.8967 -0.1334 CHEMBL5403037 |
| 651 train 5.0500 5.1829 0.1329 CHEMBL5396081 |
| 652 train 5.2500 5.1829 -0.0671 CHEMBL5436754 |
| 653 test 5.5700 5.5057 -0.0643 CHEMBL5409730 |
| 654 train 5.5500 5.9400 0.3900 CHEMBL5435495 |
| 655 train 7.0300 6.0690 -0.9610 CHEMBL5422486 |
| 656 train 5.5800 5.6091 0.0291 CHEMBL5428132 |
| 657 train 5.9000 5.2109 -0.6891 CHEMBL5414635 |
| 658 test 5.2500 5.1070 -0.1430 CHEMBL5401217 |
| 659 test 5.0800 5.6781 0.5981 CHEMBL5406568 |
| 660 test 5.5500 6.0707 0.5207 CHEMBL5439185 |
| 661 test 6.2200 5.7758 -0.4442 CHEMBL1802358 |
| 662 train 5.7800 5.7888 0.0088 CHEMBL5417527 |
| 663 test 5.1800 5.3266 0.1466 CHEMBL5424363 |
| 664 train 5.5600 5.1838 -0.3762 CHEMBL5424272 |
| 665 train 5.1400 4.9396 -0.2004 CHEMBL5405233 |
| 666 train 4.3000 5.4299 1.1299 CHEMBL361231 |
| 667 test 6.0000 6.6668 0.6668 CHEMBL261440 |
| 668 train 6.0000 6.6668 0.6668 CHEMBL261440 |
| 669 test 6.5500 6.6585 0.1085 CHEMBL326705 |
| 670 train 6.5500 6.6585 0.1085 CHEMBL326705 |
| 671 train 4.3000 4.8260 0.5260 CHEMBL382607 |
| 672 train 7.4800 7.2444 -0.2356 CHEMBL388978 |
| 673 test 8.1900 7.8558 -0.3342 CHEMBL4747410 |
| 674 train 7.1400 7.7450 0.6050 CHEMBL4796602 |
| 675 train 7.4100 7.1798 -0.2302 CHEMBL4785004 |
| 676 train 7.3700 7.1899 -0.1801 CHEMBL4753347 |
| 677 train 4.6000 4.6295 0.0295 CHEMBL399493 |
| 678 train 6.7500 6.5034 -0.2466 CHEMBL251601 |
| 679 test 6.1000 6.8168 0.7168 CHEMBL250183 |
| 680 train 6.7500 6.9839 0.2339 CHEMBL5288565 |
| 681 train 7.2100 7.7468 0.5368 CHEMBL5273872 |
| 682 train 8.7000 7.8814 -0.8186 CHEMBL5265990 |
| 683 test 5.6800 5.5629 -0.1170 CHEMBL4779572 |
| 684 test 5.7000 6.0342 0.3342 CHEMBL44541 |
| 685 train 8.0000 8.3666 0.3666 CHEMBL361708 |
| 686 test 8.0000 8.3897 0.3897 CHEMBL361708 |
| 687 train 5.2200 5.8153 0.5953 CHEMBL134501 |
| 688 train 6.6800 6.8986 0.2186 CHEMBL5639827 |
| 689 train 4.3700 4.8143 0.4443 CHEMBL206659 |
| 690 train 4.7000 4.6881 -0.0119 CHEMBL202695 |
| 691 train 4.9600 5.2323 0.2723 CHEMBL203571 |
| 692 train 6.7200 5.2276 -1.4924 CHEMBL203407 |
| 693 train 4.5400 5.3306 0.7906 CHEMBL206109 |
| 694 train 7.3000 7.2444 -0.0556 CHEMBL388978 |
| 695 train 7.1900 7.0502 -0.1398 CHEMBL5598350 |
| 696 test 7.3800 6.9332 -0.4468 CHEMBL584757 |
| 697 test 7.1800 6.8019 -0.3781 CHEMBL572973 |
| 698 test 6.8500 7.0795 0.2295 CHEMBL575021 |
| 699 train 5.3000 5.1251 -0.1749 CHEMBL143419 |
| 700 train 6.0400 6.0675 0.0275 CHEMBL257834 |
| 701 train 8.0000 8.3666 0.3666 CHEMBL361708 |
| 702 train 8.0000 8.3897 0.3897 CHEMBL361708 |
| 703 train 8.0600 8.1416 0.0816 CHEMBL3301610 |
| 704 train 4.8000 6.1240 1.3240 CHEMBL4129590 |
| 705 train 5.1400 6.2646 1.1246 CHEMBL3931871 |
| 706 test 5.1400 6.2646 1.1246 CHEMBL3931871 |
| 707 train 7.7600 6.4128 -1.3472 CHEMBL501724 |
| 708 train 7.7600 6.4128 -1.3472 CHEMBL501724 |
| 709 train 7.1100 6.2569 -0.8531 CHEMBL3545157 |
| 710 train 5.3100 6.0835 0.7735 CHEMBL5429577 |
| 711 train 7.6200 7.1131 -0.5069 CHEMBL98153 |
| 712 train 7.7500 6.5473 -1.2027 CHEMBL3735506 |
| 713 test 7.7500 6.5473 -1.2027 CHEMBL3735506 |
| 714 train 6.6000 6.8429 0.2429 CHEMBL1940908 |
| 715 test 7.1600 6.3714 -0.7886 CHEMBL3736086 |
| 716 train 7.1600 6.3714 -0.7886 CHEMBL3736086 |
| 717 train 4.3900 6.6591 2.2691 CHEMBL120941 |
| 718 test 5.9000 6.9081 1.0081 CHEMBL4460479 |
| 719 train 7.1500 6.8573 -0.2927 CHEMBL4467668 |
| 720 train 6.6200 6.8829 0.2629 CHEMBL4550261 |
| 721 train 6.7000 7.4673 0.7673 CHEMBL4535643 |
| 722 train 6.4200 7.0801 0.6601 CHEMBL322970 |
| 723 train 5.7500 6.5476 0.7976 CHEMBL4459001 |
| 724 test 5.8400 5.9961 0.1561 CHEMBL4519366 |
| 725 train 6.3900 7.5039 1.1139 CHEMBL4452888 |
| 726 train 6.6200 6.3092 -0.3108 CHEMBL3110144 |
| 727 train 6.1600 5.9792 -0.1808 CHEMBL3110140 |
| 728 train 6.3000 5.9209 -0.3791 CHEMBL142826 |
| 729 train 6.6100 7.1316 0.5216 CHEMBL4462530 |
| 730 train 6.0500 5.9216 -0.1284 CHEMBL2022421 |
| 731 test 5.9600 5.8174 -0.1426 CHEMBL2024374 |
| 732 test 6.3000 5.9736 -0.3264 CHEMBL77540 |
| 733 train 8.1500 7.6636 -0.4864 CHEMBL4752296 |
| 734 train 6.0000 5.7648 -0.2352 CHEMBL182904 |
| 735 test 4.2200 5.1933 0.9733 CHEMBL77002 |
| 736 train 8.0500 7.0439 -1.0061 CHEMBL3091545 |
| 737 train 5.7200 6.0156 0.2956 CHEMBL3093044 |
| 738 test 4.0000 5.5521 1.5521 CHEMBL26000 |
| 739 test 4.7500 5.1457 0.3957 CHEMBL4284111 |
| 740 test 4.6800 6.1797 1.4997 CHEMBL4287420 |
| 741 train 4.3500 5.0638 0.7138 CHEMBL4289419 |
| 742 test 6.7900 6.3318 -0.4582 CHEMBL2391133 |
| 743 train 6.8200 6.4621 -0.3579 CHEMBL2390958 |
| 744 train 7.0800 6.6464 -0.4336 CHEMBL2391132 |
| 745 test 7.5400 6.6241 -0.9159 CHEMBL2391121 |
| 746 train 7.8200 7.2444 -0.5756 CHEMBL388978 |
| 747 train 7.8400 7.7842 -0.0558 CHEMBL4744911 |
| 748 train 7.5800 7.4757 -0.1043 CHEMBL4756424 |
| 749 train 7.5100 7.7622 0.2522 CHEMBL4799661 |
| 750 train 7.6600 7.1192 -0.5408 CHEMBL4789145 |
| 751 train 6.6200 7.4261 0.8061 CHEMBL4746403 |
| 752 test 7.3900 7.0469 -0.3431 CHEMBL4749327 |
| 753 train 4.6400 5.8492 1.2092 CHEMBL428968 |
| 754 train 6.2200 6.0295 -0.1905 CHEMBL76941 |
| 755 train 8.6000 7.9307 -0.6693 CHEMBL66292 |
| 756 test 7.2000 7.1301 -0.0699 CHEMBL302969 |
| 757 train 6.6000 7.2796 0.6796 CHEMBL67310 |
| 758 train 8.3000 7.9517 -0.3483 CHEMBL309152 |
| 759 train 7.0000 6.7486 -0.2514 CHEMBL260163 |
| 760 train 7.0000 6.7486 -0.2514 CHEMBL260163 |
| 761 train 8.0000 7.0013 -0.9987 CHEMBL308455 |
| 762 train 6.0200 5.9816 -0.0384 CHEMBL3734973 |
| 763 train 6.0200 5.9816 -0.0384 CHEMBL3734973 |
| 764 train 6.4400 6.3724 -0.0676 CHEMBL3734924 |
| 765 test 6.4400 6.3724 -0.0676 CHEMBL3734924 |
| 766 train 7.7000 7.3049 -0.3951 CHEMBL3735856 |
| 767 test 7.7000 7.3049 -0.3951 CHEMBL3735856 |
| 768 train 6.6800 6.8341 0.1541 CHEMBL3736600 |
| 769 test 6.6800 6.8341 0.1541 CHEMBL3736600 |
| 770 train 6.3500 6.1910 -0.1590 CHEMBL3735154 |
| 771 train 6.3500 6.1910 -0.1590 CHEMBL3735154 |
| 772 test 5.0900 6.3708 1.2808 CHEMBL4205137 |
| 773 train 7.2300 7.4400 0.2100 CHEMBL4476724 |
| 774 test 7.2300 7.4400 0.2100 CHEMBL4476724 |
| 775 train 6.8900 6.7448 -0.1452 CHEMBL4546384 |
| 776 train 6.3000 5.9080 -0.3920 CHEMBL44545 |
| 777 train 7.2800 7.0130 -0.2670 CHEMBL5598425 |
| 778 test 8.1000 7.4489 -0.6511 CHEMBL2048679 |
| 779 train 8.1000 7.4489 -0.6511 CHEMBL2048679 |
| 780 train 7.7000 7.2807 -0.4193 CHEMBL1940985 |
| 781 train 7.7000 7.2807 -0.4193 CHEMBL1940985 |
| 782 test 7.8200 8.6294 0.8094 CHEMBL363058 |
| 783 test 5.2800 5.6923 0.4123 CHEMBL120078 |
| 784 train 6.6300 5.9972 -0.6328 CHEMBL3673983 |
| 785 train 8.4000 7.6072 -0.7928 CHEMBL50894 |
| 786 test 5.7000 5.5244 -0.1756 CHEMBL284861 |
| 787 test 6.5800 6.8305 0.2505 CHEMBL596072 |
| 788 train 6.5800 6.8305 0.2505 CHEMBL596072 |
| 789 train 6.8000 6.4761 -0.3239 CHEMBL596290 |
| 790 train 6.8000 6.4761 -0.3239 CHEMBL596290 |
| 791 train 5.1600 5.3635 0.2035 CHEMBL26241 |
| 792 test 5.5200 5.5283 0.0083 CHEMBL335357 |
| 793 train 4.1200 4.6416 0.5216 CHEMBL142327 |
| 794 train 6.0000 5.4822 -0.5178 CHEMBL142711 |
| 795 train 4.0900 4.4005 0.3105 CHEMBL2334796 |
| 796 train 7.6600 7.2124 -0.4476 CHEMBL2180854 |
| 797 test 9.3100 9.0986 -0.2114 CHEMBL5414551 |
| 798 train 9.3500 9.2908 -0.0592 CHEMBL5435368 |
| 799 train 4.7200 5.7825 1.0625 CHEMBL5411871 |
| 800 train 6.3800 6.8221 0.4421 CHEMBL5419581 |
| 801 test 6.2300 6.8822 0.6522 CHEMBL5402699 |
| 802 test 6.4200 7.0426 0.6226 CHEMBL5412373 |
| 803 test 7.0400 7.9012 0.8612 CHEMBL102714 |
| 804 train 7.5700 7.4315 -0.1385 CHEMBL3093053 |
| 805 train 6.0000 5.8662 -0.1338 CHEMBL2062565 |
| 806 train 5.5800 5.9492 0.3692 CHEMBL2062575 |
| 807 train 4.4000 4.8456 0.4456 CHEMBL2435287 |
| 808 train 6.0100 6.4050 0.3950 CHEMBL2391124 |
| 809 test 7.3000 6.6958 -0.6042 CHEMBL2177142 |
| 810 train 5.0200 4.9539 -0.0661 CHEMBL5395027 |
| 811 train 5.3600 5.7197 0.3597 CHEMBL5397157 |
| 812 train 5.0800 5.7879 0.7079 CHEMBL1336 |
| 813 train 7.0100 7.2944 0.2844 CHEMBL3949162 |
| 814 train 9.7000 8.0138 -1.6862 CHEMBL3963605 |
| 815 train 5.5100 5.3688 -0.1412 CHEMBL3892099 |
| 816 train 5.8200 5.1179 -0.7021 CHEMBL3909349 |
| 817 train 5.1900 5.2780 0.0880 CHEMBL3980746 |
| 818 train 8.5600 7.5178 -1.0422 CHEMBL1684800 |
| 819 test 8.1500 7.5244 -0.6256 CHEMBL1957947 |
| 820 train 8.0000 7.4222 -0.5778 CHEMBL1957960 |
| 821 train 5.3000 5.6888 0.3888 CHEMBL4105195 |
| 822 train 6.1500 7.1313 0.9813 CHEMBL1630490 |
| 823 test 6.0000 6.6648 0.6648 CHEMBL4472277 |
| 824 train 7.3400 6.4085 -0.9315 CHEMBL3891139 |
| 825 train 8.8500 6.7571 -2.0929 CHEMBL4579826 |
| 826 train 6.6600 6.2804 -0.3796 CHEMBL4557360 |
| 827 train 5.4200 6.3509 0.9309 CHEMBL4442898 |
| 828 train 8.3100 8.4349 0.1249 CHEMBL412142 |
| 829 train 8.3100 8.4349 0.1249 CHEMBL412142 |
| 830 test 4.8000 5.5074 0.7074 CHEMBL4214720 |
| 831 train 5.2600 5.5047 0.2447 CHEMBL4206546 |
| 832 test 5.2200 5.9827 0.7627 CHEMBL4210913 |
| 833 train 5.2200 5.2756 0.0556 CHEMBL4212059 |
| 834 train 5.2200 5.2756 0.0556 CHEMBL4212059 |
| 835 train 5.1600 4.6836 -0.4764 CHEMBL569595 |
| 836 train 6.4800 6.3815 -0.0985 CHEMBL451857 |
| 837 train 8.5100 8.2215 -0.2885 CHEMBL499006 |
| 838 train 5.5300 5.0522 -0.4778 CHEMBL4792670 |
| 839 train 7.8500 6.6170 -1.2330 CHEMBL156277 |
| 840 train 4.3000 4.7252 0.4252 CHEMBL143525 |
| 841 train 6.8900 6.7467 -0.1433 CHEMBL1091082 |
| 842 test 6.8900 6.7467 -0.1433 CHEMBL1091082 |
| 843 train 5.2300 6.2115 0.9815 CHEMBL1085918 |
| 844 test 5.2300 6.2115 0.9815 CHEMBL1085918 |
| 845 test 6.5700 6.1473 -0.4227 CHEMBL1092134 |
| 846 train 6.5700 6.1473 -0.4227 CHEMBL1092134 |
| 847 test 8.0000 7.6096 -0.3904 CHEMBL3735176 |
| 848 train 8.0000 7.6096 -0.3904 CHEMBL3735176 |
| 849 train 6.4000 6.3474 -0.0526 CHEMBL3736399 |
| 850 train 6.4000 6.3474 -0.0526 CHEMBL3736399 |
| 851 train 5.4900 5.4056 -0.0844 CHEMBL5412998 |
| 852 train 5.5200 6.9187 1.3987 CHEMBL5421699 |
| 853 train 6.1000 6.6783 0.5783 CHEMBL5289972 |
| 854 test 6.8000 6.6435 -0.1565 CHEMBL4872690 |
| 855 train 6.7000 7.0345 0.3345 CHEMBL4851865 |
| 856 train 6.4200 5.7758 -0.6442 CHEMBL1802358 |
| 857 train 7.2000 7.5524 0.3524 CHEMBL4282154 |
| 858 train 5.9600 6.6561 0.6961 CHEMBL398647 |
| 859 train 7.4300 7.4199 -0.0101 CHEMBL392167 |
| 860 train 7.1200 6.5307 -0.5893 CHEMBL156987 |
| 861 train 5.8100 6.0155 0.2055 CHEMBL270046 |
| 862 train 4.6400 5.3612 0.7212 CHEMBL2163999 |
| 863 train 6.2400 5.6807 -0.5593 CHEMBL3736396 |
| 864 train 6.2400 5.6807 -0.5593 CHEMBL3736396 |
| 865 train 6.8900 6.8200 -0.0700 CHEMBL3919644 |
| 866 train 7.5700 6.7851 -0.7849 CHEMBL1082236 |
| 867 train 7.5700 6.7851 -0.7849 CHEMBL1082236 |
| 868 train 5.9600 6.3881 0.4281 CHEMBL1083209 |
| 869 train 5.9600 6.3881 0.4281 CHEMBL1083209 |
| 870 test 5.8900 5.7540 -0.1360 CHEMBL1086174 |
| 871 train 5.8900 5.7540 -0.1360 CHEMBL1086174 |
| 872 train 8.1000 7.3762 -0.7238 CHEMBL1095041 |
| 873 train 8.1000 7.3762 -0.7238 CHEMBL1095041 |
| 874 train 7.9200 7.4395 -0.4805 CHEMBL1077213 |
| 875 test 7.9200 7.4395 -0.4805 CHEMBL1077213 |
| 876 train 7.8500 7.3047 -0.5453 CHEMBL1097694 |
| 877 test 7.8500 7.3047 -0.5453 CHEMBL1097694 |
| 878 train 4.9100 5.6316 0.7216 CHEMBL1085919 |
| 879 train 4.9100 5.6316 0.7216 CHEMBL1085919 |
| 880 train 6.2600 5.9972 -0.2628 CHEMBL3673983 |
| 881 test 6.2600 5.8777 -0.3823 CHEMBL5750517 |
| 882 test 4.9300 6.6288 1.6988 CHEMBL5396715 |
| 883 test 5.3000 5.3210 0.0210 CHEMBL24753 |
| 884 train 7.1500 6.6055 -0.5445 CHEMBL201511 |
| 885 train 7.4000 6.6958 -0.7042 CHEMBL2177142 |
| 886 train 6.2100 6.2169 0.0069 CHEMBL182283 |
| 887 test 8.2200 7.9329 -0.2871 CHEMBL105477 |
| 888 train 7.5200 7.2444 -0.2756 CHEMBL388978 |
| 889 train 5.7200 6.3818 0.6618 CHEMBL368895 |
| 890 train 5.3300 5.8517 0.5217 CHEMBL1630438 |
| 891 train 6.0700 6.3285 0.2585 CHEMBL1630474 |
| 892 train 6.0900 6.7963 0.7063 CHEMBL1630478 |
| 893 train 7.7500 7.4240 -0.3260 CHEMBL1630487 |
| 894 train 5.7200 4.8103 -0.9097 CHEMBL306263 |
| 895 train 4.1100 6.3385 2.2285 CHEMBL1448 |
| 896 train 5.3800 6.0094 0.6294 CHEMBL5091238 |
| 897 test 5.4800 5.5345 0.0545 CHEMBL5431535 |
| 898 test 6.8200 7.3904 0.5704 CHEMBL5270055 |
| 899 train 6.8200 6.7907 -0.0293 CHEMBL336961 |
| 900 test 5.9200 4.9129 -1.0071 CHEMBL74015 |
| 901 train 6.4300 6.2658 -0.1642 CHEMBL178945 |
| 902 train 6.7000 6.9808 0.2808 CHEMBL175956 |
| 903 test 6.0500 6.4575 0.4075 CHEMBL360304 |
| 904 test 4.7700 6.4454 1.6754 CHEMBL476851 |
| 905 train 6.0500 5.8401 -0.2099 CHEMBL3763944 |
| 906 train 6.0500 5.7718 -0.2782 CHEMBL3763944 |
| 907 train 6.0500 5.7718 -0.2782 CHEMBL3763944 |
| 908 train 4.8300 4.3531 -0.4769 CHEMBL3752684 |
| 909 train 4.8300 4.1354 -0.6946 CHEMBL3752684 |
| 910 test 4.8300 4.6807 -0.1493 CHEMBL3752684 |
| 911 train 6.0000 6.5595 0.5595 CHEMBL2064535 |
| 912 train 6.5100 6.7108 0.2008 CHEMBL4646272 |
| 913 train 4.7200 4.3771 -0.3429 CHEMBL4076026 |
| 914 train 5.0600 4.3771 -0.6829 CHEMBL4092659 |
| 915 train 7.4000 7.2444 -0.1556 CHEMBL388978 |
| 916 train 7.2700 7.2444 -0.0256 CHEMBL388978 |
| 917 train 6.8200 6.7081 -0.1119 CHEMBL4648941 |
| 918 train 7.7700 7.3471 -0.4229 CHEMBL4645337 |
| 919 test 6.2800 5.3385 -0.9415 CHEMBL454662 |
| 920 test 6.2800 5.2542 -1.0258 CHEMBL454662 |
| 921 train 7.2100 7.0083 -0.2017 CHEMBL4800403 |
| 922 train 6.8800 7.2261 0.3461 CHEMBL4750284 |
| 923 train 4.7700 5.1959 0.4259 CHEMBL3763264 |
| 924 train 4.7700 5.1933 0.4233 CHEMBL3763264 |
| 925 train 6.7200 5.6887 -1.0313 CHEMBL1230165 |
| 926 train 7.5000 5.9259 -1.5741 CHEMBL1957092 |
| 927 train 6.1000 5.2676 -0.8324 CHEMBL1957097 |
| 928 train 7.7000 6.4173 -1.2827 CHEMBL1957102 |
| 929 train 6.1000 5.9259 -0.1741 CHEMBL1957091 |
| 930 train 4.4000 5.5277 1.1277 CHEMBL1957095 |
| 931 train 4.5000 5.2676 0.7676 CHEMBL1957097 |
| 932 train 4.2000 5.8870 1.6870 CHEMBL1957101 |
| 933 test 5.3200 5.7358 0.4158 CHEMBL77697 |
| 934 train 4.9200 5.0584 0.1384 CHEMBL77458 |
| 935 train 4.3000 6.2674 1.9674 CHEMBL4094440 |
| 936 train 6.5700 6.2850 -0.2850 CHEMBL366668 |
| 937 train 5.2800 5.2870 0.0070 CHEMBL361833 |
| 938 train 7.5200 6.4446 -1.0754 CHEMBL405759 |
| 939 test 6.2200 5.8668 -0.3532 CHEMBL120497 |
| 940 test 5.8500 5.5052 -0.3448 CHEMBL3734853 |
| 941 train 5.8500 5.5052 -0.3448 CHEMBL3734853 |
| 942 train 6.2400 5.6807 -0.5593 CHEMBL3736396 |
| 943 train 6.2400 5.6807 -0.5593 CHEMBL3736396 |
| 944 train 5.8500 5.9636 0.1136 CHEMBL3735882 |
| 945 train 5.8500 5.9636 0.1136 CHEMBL3735882 |
| 946 test 6.1600 5.8152 -0.3448 CHEMBL3735293 |
| 947 train 6.1600 5.8152 -0.3448 CHEMBL3735293 |
| 948 test 9.1900 8.5162 -0.6738 CHEMBL3091544 |
| 949 train 8.1900 8.7589 0.5689 CHEMBL3091543 |
| 950 train 7.7500 7.8340 0.0840 CHEMBL103055 |
| 951 train 6.4100 6.2118 -0.1982 CHEMBL3298823 |
| 952 train 6.1700 6.3277 0.1577 CHEMBL1669586 |
| 953 train 7.1000 7.1816 0.0816 CHEMBL4089331 |
| 954 test 9.7000 8.1995 -1.5005 CHEMBL4063206 |
| 955 train 7.8500 8.1165 0.2665 CHEMBL4095163 |
| 956 train 8.0000 8.4349 0.4349 CHEMBL412142 |
| 957 train 8.0000 8.4349 0.4349 CHEMBL412142 |
| 958 test 4.3900 4.1619 -0.2281 CHEMBL5971041 |
| 959 train 4.3900 4.4434 0.0534 CHEMBL5971041 |
| 960 train 4.3900 4.4052 0.0152 CHEMBL5971041 |
| 961 test 8.0200 7.8121 -0.2079 CHEMBL1997924 |
| 962 train 8.0200 7.8121 -0.2079 CHEMBL1997924 |
| 963 train 8.5800 7.2444 -1.3356 CHEMBL388978 |
| 964 train 8.4000 8.7952 0.3952 CHEMBL4640019 |
| 965 test 8.4000 8.7952 0.3952 CHEMBL4640019 |
| 966 train 5.6000 5.5035 -0.0965 CHEMBL413032 |
| 967 test 6.2000 7.2183 1.0183 CHEMBL1272270 |
| 968 train 8.1000 7.2529 -0.8471 CHEMBL408019 |
| 969 test 8.1000 7.2529 -0.8471 CHEMBL408019 |
| 970 train 7.8900 7.2553 -0.6347 CHEMBL470167 |
| 971 test 7.8000 7.9619 0.1619 CHEMBL469507 |
| 972 test 7.8000 7.9619 0.1619 CHEMBL469507 |
| 973 train 5.3600 6.0671 0.7071 CHEMBL4454916 |
| 974 train 6.1600 5.1459 -1.0141 CHEMBL122899 |
| 975 test 5.9400 6.9415 1.0015 CHEMBL552470 |
| 976 test 7.4200 7.8305 0.4105 CHEMBL6291 |
| 977 train 6.1700 5.3155 -0.8545 CHEMBL3099839 |
| 978 test 6.0200 5.5371 -0.4829 CHEMBL563685 |
| 979 train 5.3100 5.5371 0.2271 CHEMBL550052 |
| 980 train 6.7000 7.2444 0.5444 CHEMBL388978 |
| 981 test 5.9600 6.3829 0.4229 CHEMBL560585 |
| 982 train 8.9600 9.0255 0.0655 CHEMBL362558 |
| 983 train 8.7000 8.2007 -0.4993 CHEMBL549953 |
| 984 train 8.5500 7.8305 -0.7195 CHEMBL6291 |
| 985 train 4.2200 5.1933 0.9733 CHEMBL77002 |
| 986 train 8.0000 7.8420 -0.1580 CHEMBL69588 |
| 987 train 9.2100 8.1465 -1.0635 CHEMBL5417641 |
| 988 train 5.9600 6.0535 0.0935 CHEMBL2022423 |
| 989 train 6.5200 6.3631 -0.1569 CHEMBL2022415 |
| 990 train 5.9200 6.1436 0.2236 CHEMBL2024370 |
| 991 test 9.0700 8.2536 -0.8164 CHEMBL5290181 |
| 992 train 9.6000 8.3905 -1.2095 CHEMBL5283410 |
| 993 train 9.1000 8.6939 -0.4061 CHEMBL5272041 |
| 994 train 8.4300 7.9076 -0.5224 CHEMBL5291257 |
| 995 train 8.6000 7.9264 -0.6736 CHEMBL5276314 |
| 996 train 7.8200 7.5846 -0.2354 CHEMBL4748993 |
| 997 train 6.5800 7.6719 1.0919 CHEMBL4759253 |
| 998 test 7.7200 7.7772 0.0572 CHEMBL4796437 |
| 999 test 7.3500 7.2012 -0.1488 CHEMBL4791089 |
| 1000 train 6.6500 7.1490 0.4990 CHEMBL520147 |
| 1001 train 6.5000 7.3031 0.8031 CHEMBL491859 |
| 1002 train 6.1200 6.1542 0.0342 CHEMBL2064538 |
| 1003 train 6.2400 7.6977 1.4577 CHEMBL399139 |
| 1004 train 5.6600 6.2648 0.6048 CHEMBL251885 |
| 1005 train 7.8500 7.2277 -0.6223 CHEMBL3401120 |
| 1006 train 7.9200 7.8775 -0.0425 CHEMBL3091536 |
| 1007 test 7.5000 7.2233 -0.2767 CHEMBL3401125 |
| 1008 train 9.5100 8.7403 -0.7697 CHEMBL5410665 |
| 1009 train 7.9200 7.8775 -0.0425 CHEMBL3091536 |
| 1010 train 5.6100 6.3197 0.7097 CHEMBL3091533 |
| 1011 train 5.3500 5.2837 -0.0663 CHEMBL464381 |
| 1012 train 5.3500 5.2203 -0.1297 CHEMBL464381 |
| 1013 train 5.2000 5.6565 0.4565 CHEMBL4095689 |
| 1014 test 5.3200 4.8746 -0.4454 CHEMBL4103963 |
| 1015 test 5.1100 5.1022 -0.0078 CHEMBL4078207 |
| 1016 test 5.1400 5.1403 0.0003 CHEMBL4071797 |
| 1017 train 5.4700 6.5418 1.0718 CHEMBL1834116 |
| 1018 train 7.8900 6.6483 -1.2417 CHEMBL1834315 |
| 1019 test 7.3100 7.0165 -0.2935 CHEMBL1834326 |
| 1020 test 8.5900 8.8442 0.2542 CHEMBL178737 |
| 1021 train 8.4000 7.6072 -0.7928 CHEMBL50894 |
| 1022 train 5.2200 6.3356 1.1156 CHEMBL4214903 |
| 1023 train 4.7400 6.2833 1.5433 CHEMBL394683 |
| 1024 train 5.2200 6.2458 1.0258 CHEMBL4208450 |
| 1025 train 8.0600 8.7021 0.6421 CHEMBL178851 |
| 1026 train 8.1100 9.1168 1.0068 CHEMBL181339 |
| 1027 test 7.0100 6.6321 -0.3779 CHEMBL1824331 |
| 1028 train 6.8000 6.5307 -0.2693 CHEMBL156987 |
| 1029 train 4.9200 5.5874 0.6674 CHEMBL178268 |
| 1030 test 5.0600 5.8048 0.7448 CHEMBL178769 |
| 1031 train 4.8500 5.4216 0.5716 CHEMBL5082923 |
| 1032 train 4.0400 5.5523 1.5123 CHEMBL5081821 |
| 1033 train 6.0400 6.2784 0.2384 CHEMBL5085851 |
| 1034 train 6.4800 6.1830 -0.2970 CHEMBL5078303 |
| 1035 test 6.3100 6.7077 0.3977 CHEMBL259850 |
| 1036 test 7.7300 7.2444 -0.4856 CHEMBL388978 |
| 1037 test 7.3000 6.2189 -1.0811 CHEMBL380946 |
| 1038 train 7.3000 6.2189 -1.0811 CHEMBL380946 |
| 1039 train 6.0000 5.4466 -0.5534 CHEMBL5078490 |
| 1040 train 5.6000 5.7728 0.1728 CHEMBL5075604 |
| 1041 train 7.4600 7.5084 0.0484 CHEMBL301138 |
| 1042 train 6.7400 6.9817 0.2417 CHEMBL489407 |
| 1043 train 6.5800 6.3948 -0.1852 CHEMBL522760 |
| 1044 train 8.1500 7.8762 -0.2738 CHEMBL489422 |
| 1045 train 9.2900 8.6375 -0.6525 CHEMBL489833 |
| 1046 train 7.8800 8.2511 0.3711 CHEMBL490861 |
| 1047 train 7.4400 6.4719 -0.9681 CHEMBL3398203 |
| 1048 train 7.2900 6.0146 -1.2754 CHEMBL4089159 |
| 1049 train 8.1900 7.1857 -1.0043 CHEMBL513878 |
| 1050 train 8.6000 8.0893 -0.5107 CHEMBL513570 |
| 1051 train 7.6400 7.3915 -0.2485 CHEMBL296586 |
| 1052 train 6.8600 6.6249 -0.2351 CHEMBL494089 |
| 1053 test 5.4000 6.3333 0.9333 CHEMBL1095624 |
| 1054 train 5.5800 6.4163 0.8363 CHEMBL1098943 |
| 1055 test 6.4000 6.4084 0.0084 CHEMBL1098944 |
| 1056 test 6.7200 6.2363 -0.4837 CHEMBL1099296 |
| 1057 test 7.6400 6.4116 -1.2284 CHEMBL404507 |
| 1058 train 5.1000 5.1702 0.0702 CHEMBL24073 |
| 1059 train 7.0000 7.0083 0.0083 CHEMBL402367 |
| 1060 train 6.3800 6.6198 0.2398 CHEMBL250369 |
| 1061 train 5.5100 5.7376 0.2276 CHEMBL1170317 |
| 1062 test 5.5000 6.7072 1.2072 CHEMBL2064521 |
| 1063 train 6.5000 6.6055 0.1055 CHEMBL2064515 |
| 1064 train 6.8900 7.6747 0.7847 CHEMBL398498 |
| 1065 train 6.8900 7.6463 0.7563 CHEMBL398498 |
| 1066 train 6.6300 6.4974 -0.1326 CHEMBL2391123 |
| 1067 train 7.0800 6.1039 -0.9761 CHEMBL2391099 |
| 1068 train 7.4600 7.3739 -0.0861 CHEMBL2391100 |
| 1069 test 7.9600 8.0118 0.0518 CHEMBL4787873 |
| 1070 train 7.3100 7.5639 0.2539 CHEMBL4785551 |
| 1071 train 5.8900 6.2524 0.3624 CHEMBL590109 |
| 1072 train 5.8900 6.2524 0.3624 CHEMBL590109 |
| 1073 train 6.6600 6.6195 -0.0405 CHEMBL593374 |
| 1074 test 6.6600 6.6195 -0.0405 CHEMBL593374 |
| 1075 train 6.5500 6.5186 -0.0314 CHEMBL594755 |
| 1076 test 6.5500 6.5186 -0.0314 CHEMBL594755 |
| 1077 train 7.3600 6.5266 -0.8334 CHEMBL3929715 |
| 1078 test 7.0000 7.1355 0.1355 CHEMBL63803 |
| 1079 train 6.9000 7.0158 0.1158 CHEMBL2386111 |
| 1080 train 5.5000 6.2752 0.7752 CHEMBL66004 |
| 1081 train 6.9600 6.7004 -0.2596 CHEMBL1834121 |
| 1082 train 6.0000 6.2340 0.2340 CHEMBL1834319 |
| 1083 train 7.1200 7.0497 -0.0703 CHEMBL1834325 |
| 1084 train 7.2400 6.8686 -0.3714 CHEMBL1834329 |
| 1085 train 7.9200 6.8686 -1.0514 CHEMBL1834330 |
| 1086 train 8.5900 8.8442 0.2542 CHEMBL178737 |
| 1087 train 8.2800 9.0828 0.8028 CHEMBL186290 |
| 1088 train 8.8900 8.8442 -0.0458 CHEMBL178737 |
| 1089 test 6.5100 6.3537 -0.1563 CHEMBL250145 |
| 1090 test 5.3400 6.6197 1.2797 CHEMBL399078 |
| 1091 train 5.0100 6.2848 1.2748 CHEMBL249734 |
| 1092 train 7.1000 7.1131 0.0131 CHEMBL99037 |
| 1093 train 4.0000 4.7166 0.7166 CHEMBL451532 |
| 1094 train 6.8300 5.9863 -0.8437 CHEMBL3827726 |
| 1095 test 6.9800 6.2173 -0.7627 CHEMBL3828609 |
| 1096 train 6.5200 6.5167 -0.0033 CHEMBL2022413 |
| 1097 train 6.3000 6.0040 -0.2960 CHEMBL2024372 |
| 1098 train 6.0000 6.2929 0.2929 CHEMBL2024368 |
| 1099 test 6.0000 6.3821 0.3821 CHEMBL2024367 |
| 1100 train 6.2200 5.5637 -0.6563 CHEMBL2024362 |
| 1101 train 5.7000 6.0368 0.3368 CHEMBL2024361 |
| 1102 train 5.5200 5.5620 0.0420 CHEMBL554295 |
| 1103 test 5.2200 7.1953 1.9753 CHEMBL550950 |
| 1104 train 5.2200 5.3635 0.1435 CHEMBL24311 |
| 1105 train 7.6600 6.4965 -1.1635 CHEMBL126077 |
| 1106 train 5.5200 5.9209 0.4009 CHEMBL1801611 |
| 1107 test 4.4200 4.5711 0.1511 CHEMBL2334794 |
| 1108 train 4.5600 4.9030 0.3430 CHEMBL2334793 |
| 1109 test 4.6000 4.6536 0.0536 CHEMBL2207940 |
| 1110 train 4.3700 4.5612 0.1912 CHEMBL2334786 |
| 1111 test 4.1700 5.1510 0.9810 CHEMBL2334798 |
| 1112 test 4.6400 5.1718 0.5318 CHEMBL2334795 |
| 1113 train 7.5100 7.2830 -0.2270 CHEMBL1969664 |
| 1114 train 4.9300 4.1377 -0.7923 CHEMBL4064706 |
| 1115 train 4.5700 4.3771 -0.1929 CHEMBL4073006 |
| 1116 train 4.7200 4.3771 -0.3429 CHEMBL4076026 |
| 1117 train 8.9200 7.8281 -1.0919 CHEMBL4077048 |
| 1118 train 8.4200 7.9648 -0.4552 CHEMBL4065956 |
| 1119 test 6.5000 6.0505 -0.4495 CHEMBL362030 |
| 1120 train 6.0200 5.7160 -0.3040 CHEMBL3099837 |
| 1121 test 5.7200 5.9241 0.2041 CHEMBL3099836 |
| 1122 test 6.4200 5.4988 -0.9212 CHEMBL3099835 |
| 1123 train 6.4400 5.9367 -0.5033 CHEMBL3099832 |
| 1124 train 5.2500 5.8888 0.6388 CHEMBL564091 |
| 1125 train 6.3000 5.4879 -0.8121 CHEMBL357136 |
| 1126 test 4.7700 5.3420 0.5720 CHEMBL4279567 |
| 1127 test 4.7200 5.3901 0.6701 CHEMBL4293500 |
| 1128 train 5.7000 5.5443 -0.1557 CHEMBL26515 |
| 1129 test 7.3600 7.0497 -0.3103 CHEMBL1834323 |
| 1130 train 6.9200 7.1115 0.1915 CHEMBL323657 |
| 1131 train 7.7500 6.7907 -0.9593 CHEMBL336961 |
| 1132 train 8.5200 7.8305 -0.6895 CHEMBL6291 |
| 1133 test 6.7500 6.4050 -0.3450 CHEMBL2391131 |
| 1134 train 5.4500 4.9539 -0.4961 CHEMBL5427842 |
| 1135 train 5.0600 4.9539 -0.1061 CHEMBL5413743 |
| 1136 train 5.2600 4.9231 -0.3369 CHEMBL5428629 |
| 1137 train 6.7700 6.2705 -0.4995 CHEMBL5438158 |
| 1138 test 7.6000 7.8441 0.2442 CHEMBL2386107 |
| 1139 train 4.8200 4.8315 0.0115 CHEMBL77416 |
| 1140 train 6.4600 7.4142 0.9542 CHEMBL5276530 |
| 1141 train 6.3700 7.2577 0.8877 CHEMBL5282998 |
| 1142 train 7.7400 7.9890 0.2490 CHEMBL5267729 |
| 1143 train 5.8000 6.0929 0.2929 CHEMBL2024375 |
| 1144 train 6.3600 6.1086 -0.2514 CHEMBL360878 |
| 1145 train 6.5000 6.1753 -0.3247 CHEMBL182891 |
| 1146 train 6.3400 5.6476 -0.6924 CHEMBL3099833 |
| 1147 train 5.0800 5.1238 0.0438 CHEMBL131770 |
| 1148 train 5.0800 4.9518 -0.1282 CHEMBL131770 |
| 1149 train 4.8200 5.3385 0.5185 CHEMBL103006 |
| 1150 test 4.8200 5.2542 0.4342 CHEMBL103006 |
| 1151 test 4.5900 7.2943 2.7043 CHEMBL2203554 |
| 1152 test 5.0500 6.1429 1.0929 CHEMBL3093041 |
| 1153 train 5.0500 6.1429 1.0929 CHEMBL3093041 |
| 1154 train 5.6000 6.5949 0.9949 CHEMBL63595 |
| 1155 train 5.3800 6.8590 1.4790 CHEMBL333066 |
| 1156 train 7.6600 8.0385 0.3785 CHEMBL4638321 |
| 1157 train 7.6600 8.0385 0.3785 CHEMBL4638321 |
| 1158 train 8.4000 8.4480 0.0480 CHEMBL4632807 |
| 1159 test 8.4000 8.4480 0.0480 CHEMBL4632807 |
| 1160 train 7.5500 7.5123 -0.0377 CHEMBL4636306 |
| 1161 test 7.5500 7.5123 -0.0377 CHEMBL4636306 |
| 1162 train 7.3100 6.2180 -1.0920 CHEMBL368193 |
| 1163 train 6.8200 6.3956 -0.4244 CHEMBL368416 |
| 1164 test 5.8900 6.2335 0.3435 CHEMBL359808 |
| 1165 test 5.4100 6.3427 0.9327 CHEMBL359486 |
| 1166 train 7.3700 7.4373 0.0673 CHEMBL4078869 |
| 1167 train 7.1100 7.1274 0.0174 CHEMBL3091530 |
| 1168 train 9.1500 8.7161 -0.4339 CHEMBL181031 |
| 1169 train 5.8200 6.0660 0.2460 CHEMBL1801622 |
| 1170 train 6.1900 6.3065 0.1165 CHEMBL4632385 |
| 1171 train 6.1900 6.3065 0.1165 CHEMBL4632385 |
| 1172 train 7.0300 5.9672 -1.0628 CHEMBL4641105 |
| 1173 train 5.8700 6.0025 0.1325 CHEMBL4645499 |
| 1174 train 7.0500 6.5291 -0.5209 CHEMBL4641587 |
| 1175 train 6.6800 6.2240 -0.4560 CHEMBL4636075 |
| 1176 train 6.5700 6.9092 0.3392 CHEMBL4639781 |
| 1177 test 6.5000 6.6503 0.1503 CHEMBL4633926 |
| 1178 test 6.8200 7.9945 1.1745 CHEMBL4649363 |
| 1179 test 6.0500 5.8067 -0.2433 CHEMBL4636722 |
| 1180 train 6.0500 5.7983 -0.2517 CHEMBL4636722 |
| 1181 train 6.0500 5.7983 -0.2517 CHEMBL4636722 |
| 1182 train 7.5100 7.8340 0.3240 CHEMBL103421 |
| 1183 train 5.5000 5.4037 -0.0963 CHEMBL496779 |
| 1184 train 7.3000 7.0054 -0.2946 CHEMBL524059 |
| 1185 train 6.0700 6.8620 0.7920 CHEMBL496162 |
| 1186 train 7.5800 7.3472 -0.2328 CHEMBL3735522 |
| 1187 train 7.5800 7.3472 -0.2328 CHEMBL3735522 |
| 1188 train 4.8200 4.8867 0.0667 CHEMBL305627 |
| 1189 train 7.4000 5.3492 -2.0508 CHEMBL3969996 |
| 1190 train 7.6400 7.3915 -0.2485 CHEMBL296586 |
| 1191 train 4.6000 5.0207 0.4207 CHEMBL25829 |
| 1192 train 8.8200 7.0597 -1.7603 CHEMBL270473 |
| 1193 test 5.9200 5.6460 -0.2740 CHEMBL80785 |
| 1194 train 5.8500 5.5976 -0.2524 CHEMBL260463 |
| 1195 test 6.3000 5.5754 -0.7246 CHEMBL406863 |
| 1196 test 5.0900 6.4682 1.3782 CHEMBL98350 |
| 1197 train 6.3100 6.4480 0.1380 CHEMBL256306 |
| 1198 train 5.5500 5.9986 0.4486 CHEMBL256366 |
| 1199 train 5.7000 6.0605 0.3605 CHEMBL2024366 |
| 1200 test 5.7900 6.4622 0.6722 CHEMBL403238 |
| 1201 train 5.8000 6.5222 0.7222 CHEMBL258259 |
| 1202 train 5.7000 5.9547 0.2547 CHEMBL106072 |
| 1203 train 7.7500 7.8790 0.1290 CHEMBL3736455 |
| 1204 test 7.7500 7.8790 0.1290 CHEMBL3736455 |
| 1205 train 6.6200 6.5473 -0.0727 CHEMBL3735506 |
| 1206 train 6.6200 6.5473 -0.0727 CHEMBL3735506 |
| 1207 train 6.1900 7.9357 1.7457 CHEMBL4788432 |
| 1208 train 7.2000 7.6310 0.4310 CHEMBL4755345 |
| 1209 train 7.6200 7.4357 -0.1843 CHEMBL4760111 |
| 1210 train 7.6400 7.3915 -0.2485 CHEMBL296586 |
| 1211 train 5.1900 4.8199 -0.3701 CHEMBL568905 |
| 1212 train 4.7400 4.6699 -0.0701 CHEMBL290184 |
| 1213 test 4.9100 4.5854 -0.3246 CHEMBL403233 |
| 1214 train 4.6400 5.5355 0.8955 CHEMBL40835 |
| 1215 train 4.6400 6.3942 1.7542 CHEMBL408732 |
| 1216 train 4.6400 6.3942 1.7542 CHEMBL408732 |
| 1217 train 6.6300 7.6400 1.0100 CHEMBL261883 |
| 1218 train 6.6300 7.6400 1.0100 CHEMBL261883 |
| 1219 test 8.1000 7.4182 -0.6818 CHEMBL260345 |
| 1220 train 8.1000 7.4182 -0.6818 CHEMBL260345 |
| 1221 train 7.7500 7.9078 0.1578 CHEMBL407373 |
| 1222 train 7.7500 7.9078 0.1578 CHEMBL407373 |
| 1223 train 5.5500 6.6166 1.0666 CHEMBL408809 |
| 1224 train 5.5500 6.6166 1.0666 CHEMBL408809 |
| 1225 train 7.2500 7.0844 -0.1656 CHEMBL258701 |
| 1226 test 7.2500 7.0844 -0.1656 CHEMBL258701 |
| 1227 train 7.7500 8.0068 0.2568 CHEMBL260680 |
| 1228 train 7.7500 8.0068 0.2568 CHEMBL260680 |
| 1229 train 7.8000 7.9396 0.1396 CHEMBL406644 |
| 1230 train 7.8000 7.9396 0.1396 CHEMBL406644 |
| 1231 train 5.8500 5.6504 -0.1996 CHEMBL156524 |
| 1232 train 6.7900 6.5070 -0.2830 CHEMBL156153 |
| 1233 test 6.6700 6.7047 0.0347 CHEMBL156218 |
| 1234 train 6.2800 5.8727 -0.4073 CHEMBL351342 |
| 1235 train 7.0400 6.6381 -0.4019 CHEMBL347134 |
| 1236 train 6.5000 6.1498 -0.3502 CHEMBL156808 |
| 1237 train 6.3500 5.9612 -0.3888 CHEMBL160938 |
| 1238 test 6.2900 5.6055 -0.6845 CHEMBL160968 |
| 1239 train 7.1000 6.7177 -0.3823 CHEMBL159149 |
| 1240 train 7.7000 7.3216 -0.3784 CHEMBL352222 |
| 1241 train 7.1600 6.5634 -0.5966 CHEMBL345801 |
| 1242 test 6.5900 6.2891 -0.3009 CHEMBL346829 |
| 1243 train 6.8700 7.1862 0.3162 CHEMBL350702 |
| 1244 test 7.0300 7.2528 0.2228 CHEMBL157258 |
| 1245 train 6.0000 5.6655 -0.3345 CHEMBL4088216 |
| 1246 train 6.0000 6.4096 0.4096 CHEMBL1801627 |
| 1247 train 8.1000 7.0701 -1.0299 CHEMBL497564 |
| 1248 train 6.5000 6.8231 0.3231 CHEMBL1630486 |
| 1249 train 4.7000 5.0207 0.3207 CHEMBL26101 |
| 1250 train 5.5800 5.2918 -0.2882 CHEMBL307943 |
| 1251 train 5.1900 4.8011 -0.3889 CHEMBL77584 |
| 1252 train 8.4000 6.4809 -1.9191 CHEMBL1276127 |
| 1253 train 5.6000 4.8616 -0.7384 CHEMBL143090 |
| 1254 test 6.1900 5.8686 -0.3214 CHEMBL75680 |
| 1255 train 9.0200 7.8551 -1.1649 CHEMBL522590 |
| 1256 train 7.8200 7.3362 -0.4838 CHEMBL503469 |
| 1257 train 7.0500 8.0015 0.9515 CHEMBL293542 |
| 1258 train 6.7100 7.3081 0.5981 CHEMBL3983434 |
| 1259 train 5.3000 5.1497 -0.1503 CHEMBL143743 |
| 1260 test 6.0000 5.7653 -0.2347 CHEMBL593628 |
| 1261 train 6.6700 6.3431 -0.3269 CHEMBL2180881 |
| 1262 train 5.8200 6.1734 0.3534 CHEMBL1801623 |
| 1263 train 6.0000 6.2931 0.2931 CHEMBL1801626 |
| 1264 train 4.5700 4.6105 0.0405 CHEMBL399121 |
| 1265 test 8.5200 8.5736 0.0536 CHEMBL2048670 |
| 1266 train 8.5200 8.5736 0.0536 CHEMBL2048670 |
| 1267 train 8.0500 8.0886 0.0386 CHEMBL2048672 |
| 1268 train 8.0500 8.0886 0.0386 CHEMBL2048672 |
| 1269 test 4.6000 5.5644 0.9644 CHEMBL496778 |
| 1270 train 4.6000 5.4972 0.8972 CHEMBL497196 |
| 1271 test 7.5200 7.2061 -0.3139 CHEMBL545053 |
| 1272 test 8.3000 6.2205 -2.0795 CHEMBL182419 |
| 1273 train 8.0500 7.4011 -0.6489 CHEMBL337300 |
| 1274 train 7.4400 7.2873 -0.1527 CHEMBL549804 |
| 1275 train 7.4000 7.3104 -0.0896 CHEMBL562089 |
| 1276 train 7.2100 6.3106 -0.8994 CHEMBL3673984 |
| 1277 train 6.0000 5.9308 -0.0692 CHEMBL4069163 |
| 1278 train 6.1800 5.8899 -0.2901 CHEMBL4064316 |
| 1279 train 4.9100 5.0226 0.1126 CHEMBL4079572 |
| 1280 train 5.0000 5.5032 0.5032 CHEMBL1802401 |
| 1281 test 6.8900 7.5363 0.6463 CHEMBL573267 |
| 1282 train 7.9200 8.8682 0.9482 CHEMBL362814 |
| 1283 train 7.4100 7.3891 -0.0209 CHEMBL3735061 |
| 1284 test 7.4100 7.3891 -0.0209 CHEMBL3735061 |
| 1285 train 8.3300 8.5599 0.2299 CHEMBL3410097 |
| 1286 test 8.6200 8.4510 -0.1690 CHEMBL3410096 |
| 1287 train 8.6200 8.5900 -0.0300 CHEMBL3410094 |
| 1288 train 5.6600 5.4320 -0.2280 CHEMBL485745 |
| 1289 train 6.3200 6.4130 0.0930 CHEMBL404488 |
| 1290 test 7.7500 6.7907 -0.9593 CHEMBL336961 |
| 1291 train 6.3100 5.8216 -0.4884 CHEMBL578803 |
| 1292 train 4.1200 5.2845 1.1645 CHEMBL596364 |
| 1293 train 4.3000 4.6662 0.3662 CHEMBL359135 |
| 1294 train 5.0000 5.3332 0.3332 CHEMBL142764 |
| 1295 train 5.1000 4.9314 -0.1686 CHEMBL341655 |
| 1296 test 6.0000 5.6158 -0.3842 CHEMBL593629 |
| 1297 test 5.1600 4.4206 -0.7394 CHEMBL5205303 |
| 1298 train 5.1600 4.3002 -0.8598 CHEMBL5205303 |
| 1299 train 5.1600 4.7197 -0.4403 CHEMBL5205303 |
| 1300 train 5.4000 6.3200 0.9200 CHEMBL324064 |
| 1301 test 6.2500 6.1722 -0.0778 CHEMBL595944 |
| 1302 train 6.2500 6.1722 -0.0778 CHEMBL595944 |
| 1303 train 4.8000 5.8077 1.0077 CHEMBL330398 |
| 1304 train 5.0000 5.5172 0.5172 CHEMBL284365 |
| 1305 train 7.3000 6.7765 -0.5235 CHEMBL1682838 |
| 1306 train 7.2000 7.3309 0.1309 CHEMBL1682852 |
| 1307 train 6.1000 6.8613 0.7613 CHEMBL1682842 |
| 1308 test 4.7000 6.4345 1.7345 CHEMBL5432523 |
| 1309 train 5.3200 6.1420 0.8220 CHEMBL426587 |
| 1310 train 7.3600 7.2553 -0.1047 CHEMBL514401 |
| 1311 train 7.1700 7.1774 0.0074 CHEMBL472249 |
| 1312 train 7.5500 7.1414 -0.4086 CHEMBL470168 |
| 1313 train 8.2400 7.6214 -0.6186 CHEMBL512144 |
| 1314 train 6.4700 6.1817 -0.2883 CHEMBL470380 |
| 1315 train 6.1700 5.9664 -0.2036 CHEMBL513576 |
| 1316 test 8.3100 8.0033 -0.3067 CHEMBL471430 |
| 1317 train 7.7500 7.8192 0.0692 CHEMBL469508 |
| 1318 train 8.0300 7.7370 -0.2930 CHEMBL461261 |
| 1319 test 6.7000 7.2863 0.5863 CHEMBL333006 |
| 1320 train 7.1200 6.4156 -0.7044 CHEMBL332678 |
| 1321 train 5.6600 6.7467 1.0867 CHEMBL121957 |
| 1322 train 7.0000 6.8836 -0.1164 CHEMBL1164526 |
| 1323 train 7.0000 7.2801 0.2801 CHEMBL572779 |
| 1324 train 7.0300 7.4116 0.3816 CHEMBL574601 |
| 1325 train 7.5200 7.0327 -0.4873 CHEMBL329505 |
| 1326 train 4.8900 6.8538 1.9638 CHEMBL567824 |
| 1327 train 6.1100 7.8116 1.7016 CHEMBL4101984 |
| 1328 train 8.7400 8.1128 -0.6272 CHEMBL4065624 |
| 1329 train 6.6600 7.7295 1.0695 CHEMBL4077867 |
| 1330 train 8.6400 8.4122 -0.2278 CHEMBL4072455 |
| 1331 train 8.1300 8.2678 0.1378 CHEMBL4089283 |
| 1332 train 8.0700 6.8447 -1.2253 CHEMBL1682850 |
| 1333 test 5.6600 6.7765 1.1165 CHEMBL1682838 |
| 1334 test 5.4900 6.8899 1.3999 CHEMBL1682849 |
| 1335 train 6.2100 6.8447 0.6347 CHEMBL1682850 |
| 1336 test 5.8200 7.3309 1.5109 CHEMBL1682852 |
| 1337 test 5.5100 7.2339 1.7239 CHEMBL1081261 |
| 1338 test 5.5500 6.7389 1.1889 CHEMBL1081260 |
| 1339 train 8.6800 6.6126 -2.0674 CHEMBL3949218 |
| 1340 train 7.0900 5.6819 -1.4081 CHEMBL567958 |
| 1341 test 6.8800 6.0697 -0.8103 CHEMBL3827901 |
| 1342 train 6.4200 6.4664 0.0464 CHEMBL3828571 |
| 1343 test 6.9700 6.6072 -0.3628 CHEMBL3827727 |
| 1344 train 6.4900 5.6998 -0.7902 CHEMBL1630451 |
| 1345 train 6.6800 6.2692 -0.4108 CHEMBL1630467 |
| 1346 test 7.6600 6.9448 -0.7152 CHEMBL325403 |
| 1347 train 6.2700 7.2524 0.9824 CHEMBL4781112 |
| 1348 train 5.0000 5.5172 0.5172 CHEMBL24338 |
| 1349 train 5.3800 4.8694 -0.5106 CHEMBL41016 |
| 1350 train 6.4700 5.5674 -0.9026 CHEMBL564033 |
| 1351 train 6.7200 6.8167 0.0967 CHEMBL1834120 |
| 1352 test 7.1900 6.8507 -0.3393 CHEMBL1834123 |
| 1353 train 5.8200 6.5989 0.7789 CHEMBL1834317 |
| 1354 train 6.3600 7.1887 0.8287 CHEMBL1834327 |
| 1355 test 6.8000 7.1887 0.3887 CHEMBL1834328 |
| 1356 train 6.0000 5.3652 -0.6348 CHEMBL140061 |
| 1357 test 7.0300 6.6525 -0.3775 CHEMBL1086639 |
| 1358 train 7.0300 6.6525 -0.3775 CHEMBL1086639 |
| 1359 train 7.9600 7.7179 -0.2421 CHEMBL1077218 |
| 1360 train 7.9600 7.7179 -0.2421 CHEMBL1077218 |
| 1361 test 7.8500 6.7535 -1.0965 CHEMBL1089723 |
| 1362 train 7.8500 6.7535 -1.0965 CHEMBL1089723 |
| 1363 test 7.3100 7.2699 -0.0401 CHEMBL1093079 |
| 1364 train 7.3100 7.2699 -0.0401 CHEMBL1093079 |
| 1365 train 8.3000 7.5084 -0.7916 CHEMBL1093747 |
| 1366 test 8.3000 7.5084 -0.7916 CHEMBL1093747 |
| 1367 train 7.0000 6.8746 -0.1254 CHEMBL63727 |
| 1368 train 7.8000 8.4998 0.6998 CHEMBL67374 |
| 1369 train 6.1400 7.3386 1.1986 CHEMBL1086732 |
| 1370 train 8.1500 7.1131 -1.0369 CHEMBL1087499 |
| 1371 test 5.8200 4.9764 -0.8436 CHEMBL141190 |
| 1372 train 6.3000 6.1282 -0.1718 CHEMBL309347 |
| 1373 train 5.5000 5.4939 -0.0061 CHEMBL80644 |
| 1374 train 6.8500 6.6034 -0.2466 CHEMBL402560 |
| 1375 train 5.5400 5.8286 0.2886 CHEMBL403948 |
| 1376 test 6.1300 5.9955 -0.1345 CHEMBL254155 |
| 1377 train 6.3200 6.7606 0.4406 CHEMBL404242 |
| 1378 train 6.5500 6.0533 -0.4967 CHEMBL255948 |
| 1379 test 7.7000 7.2322 -0.4678 CHEMBL3652541 |
| 1380 train 6.7000 7.1515 0.4515 CHEMBL3661030 |
| 1381 train 6.6800 7.0116 0.3316 CHEMBL3699445 |
| 1382 train 7.5200 7.7179 0.1979 CHEMBL1077218 |
| 1383 train 7.5200 7.7179 0.1979 CHEMBL1077218 |
| 1384 train 7.4000 7.9520 0.5520 CHEMBL321529 |
| 1385 train 7.0800 6.9038 -0.1762 CHEMBL4550702 |
| 1386 train 5.4000 5.8343 0.4343 CHEMBL270045 |
| 1387 train 8.3000 9.1047 0.8047 CHEMBL368246 |
| 1388 train 5.6000 5.5035 -0.0965 CHEMBL413032 |
| 1389 test 7.0000 6.9755 -0.0245 CHEMBL319373 |
| 1390 train 5.1200 5.0618 -0.0582 CHEMBL6246 |
| 1391 train 5.0700 6.1965 1.1265 CHEMBL1084684 |
| 1392 train 5.0700 6.1965 1.1265 CHEMBL1084684 |
| 1393 train 8.4000 7.6072 -0.7928 CHEMBL50894 |
| 1394 train 7.9600 7.9554 -0.0046 CHEMBL3410095 |
| 1395 train 9.3500 7.8769 -1.4731 CHEMBL3410090 |
| 1396 test 5.0000 4.7811 -0.2189 CHEMBL140045 |
| 1397 train 8.3800 7.8121 -0.5679 CHEMBL1997924 |
| 1398 test 8.3800 7.8121 -0.5679 CHEMBL1997924 |
| 1399 train 7.8000 7.9036 0.1036 CHEMBL303433 |
| 1400 train 4.6000 5.3124 0.7124 CHEMBL595061 |
| 1401 train 8.2000 7.5436 -0.6564 CHEMBL306865 |
| 1402 test 6.4800 7.0159 0.5359 CHEMBL118162 |
| 1403 train 6.8900 6.9202 0.0302 CHEMBL317964 |
| 1404 train 6.3000 5.6847 -0.6153 CHEMBL120030 |
| 1405 train 5.9300 6.2170 0.2870 CHEMBL1084134 |
| 1406 test 5.9300 6.2170 0.2870 CHEMBL1084134 |
| 1407 train 6.4500 6.2568 -0.1932 CHEMBL1082235 |
| 1408 train 6.4500 6.2568 -0.1932 CHEMBL1082235 |
| 1409 train 5.6100 6.0244 0.4144 CHEMBL1086176 |
| 1410 train 7.7500 7.5060 -0.2440 CHEMBL1091081 |
| 1411 train 7.7500 7.5060 -0.2440 CHEMBL1091081 |
| 1412 test 5.3800 6.3158 0.9358 CHEMBL1077260 |
| 1413 train 5.3800 6.3158 0.9358 CHEMBL1077260 |
| 1414 train 8.4000 7.6072 -0.7928 CHEMBL50894 |
| 1415 test 6.3900 7.4469 1.0569 CHEMBL131254 |
| 1416 train 5.7200 5.2937 -0.4263 CHEMBL507249 |
| 1417 train 5.7200 5.2937 -0.4263 CHEMBL507249 |
| 1418 train 5.1200 5.5051 0.3851 CHEMBL4095674 |
| 1419 train 8.0900 8.6290 0.5390 CHEMBL1081972 |
| 1420 train 5.8900 6.7790 0.8890 CHEMBL1081293 |
| 1421 train 7.8900 7.9808 0.0908 CHEMBL4068148 |
| 1422 test 7.0500 7.2444 0.1944 CHEMBL388978 |
| 1423 train 6.8200 5.9790 -0.8410 CHEMBL5426515 |
| 1424 train 7.0500 6.6198 -0.4302 CHEMBL5440304 |
| 1425 train 5.0300 5.5079 0.4779 CHEMBL112483 |
| 1426 test 7.9000 7.7178 -0.1822 CHEMBL308430 |
| 1427 train 5.3000 5.9824 0.6824 CHEMBL316512 |
| 1428 train 6.3100 5.2143 -1.0957 CHEMBL1938959 |
| 1429 train 5.8900 6.3323 0.4423 CHEMBL119932 |
| 1430 test 5.6000 5.6677 0.0677 CHEMBL142824 |
| 1431 train 8.3000 6.2569 -2.0431 CHEMBL3545157 |
| 1432 test 8.0000 6.2050 -1.7950 CHEMBL1809116 |
| 1433 train 7.0000 6.3125 -0.6875 CHEMBL1809118 |
| 1434 train 6.6000 6.6028 0.0028 CHEMBL1809111 |
| 1435 train 7.3200 7.7978 0.4778 CHEMBL489845 |
| 1436 train 7.7900 7.5678 -0.2222 CHEMBL484685 |
| 1437 train 7.1600 7.2330 0.0730 CHEMBL576165 |
| 1438 train 6.9600 6.5109 -0.4491 CHEMBL573007 |
| 1439 test 6.1000 6.0836 -0.0164 CHEMBL483841 |
| 1440 train 5.6500 6.8200 1.1700 CHEMBL3699446 |
| 1441 train 4.5000 5.0155 0.5155 CHEMBL524901 |
| 1442 train 7.7000 7.0054 -0.6946 CHEMBL523735 |
| 1443 train 6.7100 6.3323 -0.3777 CHEMBL1086640 |
| 1444 test 6.7100 6.3323 -0.3777 CHEMBL1086640 |
| 1445 train 6.0000 5.8797 -0.1203 CHEMBL103009 |
| 1446 test 8.8000 9.0282 0.2282 CHEMBL362588 |
| 1447 train 5.4000 5.9457 0.5457 CHEMBL24494 |
| 1448 train 4.7000 5.6265 0.9265 CHEMBL523586 |
| 1449 test 6.2100 7.4469 1.2369 CHEMBL132223 |
| 1450 test 7.4000 6.4973 -0.9027 CHEMBL319467 |
| 1451 train 5.4700 5.1435 -0.3265 CHEMBL178785 |
| 1452 train 6.4000 6.3692 -0.0308 CHEMBL318208 |
| 1453 test 7.8200 6.7362 -1.0838 CHEMBL575138 |
| 1454 train 5.1400 6.4334 1.2934 CHEMBL582893 |
| 1455 train 8.9600 8.6743 -0.2857 CHEMBL4165510 |
| 1456 test 8.8900 8.5060 -0.3840 CHEMBL4162850 |
| 1457 train 5.1700 5.4363 0.2663 CHEMBL310036 |
| 1458 train 4.5700 5.7754 1.2054 CHEMBL5409837 |
| 1459 train 7.0100 6.7225 -0.2875 CHEMBL5423339 |
| 1460 train 6.8500 6.6855 -0.1645 CHEMBL5413227 |
| 1461 train 6.5300 8.3644 1.8344 CHEMBL369316 |
| 1462 train 5.7000 6.7467 1.0467 CHEMBL100309 |
| 1463 test 5.5700 6.7077 1.1377 CHEMBL259850 |
| 1464 test 6.9500 6.2684 -0.6816 CHEMBL1630446 |
| 1465 test 5.7000 5.5279 -0.1721 CHEMBL1630453 |
| 1466 train 6.8600 5.5648 -1.2952 CHEMBL1288549 |
| 1467 train 6.6100 6.4658 -0.1442 CHEMBL1630466 |
| 1468 train 6.2700 6.4222 0.1522 CHEMBL1630482 |
| 1469 train 5.7400 5.8515 0.1115 CHEMBL360340 |
| 1470 train 7.6400 8.4727 0.8327 CHEMBL5288206 |
| 1471 train 8.1900 7.1497 -1.0403 CHEMBL5272358 |
| 1472 test 8.3200 7.6533 -0.6667 CHEMBL5285396 |
| 1473 train 8.2400 7.6737 -0.5663 CHEMBL5267564 |
| 1474 train 6.5700 6.4102 -0.1598 CHEMBL572560 |
| 1475 test 6.5700 6.8578 0.2878 CHEMBL3091673 |
| 1476 train 5.6900 4.9404 -0.7496 CHEMBL4781499 |
| 1477 train 7.3000 6.3338 -0.9662 CHEMBL3735779 |
| 1478 train 7.3000 6.3338 -0.9662 CHEMBL3735779 |
| 1479 test 6.6000 6.0146 -0.5854 CHEMBL3735962 |
| 1480 train 6.6000 6.0146 -0.5854 CHEMBL3735962 |
| 1481 train 6.0000 5.8707 -0.1293 CHEMBL3735681 |
| 1482 train 6.0000 5.8707 -0.1293 CHEMBL3735681 |
| 1483 train 6.0600 5.7178 -0.3422 CHEMBL3735497 |
| 1484 test 6.0600 5.7178 -0.3422 CHEMBL3735497 |
| 1485 test 6.1700 6.0007 -0.1693 CHEMBL3736404 |
| 1486 train 6.1700 6.0007 -0.1693 CHEMBL3736404 |
| 1487 train 6.4400 6.4950 0.0550 CHEMBL3736476 |
| 1488 test 6.4400 6.4950 0.0550 CHEMBL3736476 |
| 1489 train 8.0000 7.9651 -0.0349 CHEMBL4756451 |
| 1490 train 7.5800 7.3463 -0.2337 CHEMBL4795876 |
| 1491 train 6.7100 7.3312 0.6212 CHEMBL4749550 |
| 1492 train 5.1400 5.7373 0.5973 CHEMBL489421 |
| 1493 train 6.7800 6.9102 0.1302 CHEMBL2064519 |
| 1494 test 4.9900 4.5854 -0.4046 CHEMBL403233 |
| 1495 train 8.5200 7.5850 -0.9350 CHEMBL1650951 |
| 1496 test 6.6200 6.7559 0.1359 CHEMBL334084 |
| 1497 train 5.6300 6.0836 0.4536 CHEMBL483842 |
| 1498 train 6.8200 6.3428 -0.4772 CHEMBL253272 |
| 1499 train 6.2200 6.4003 0.1803 CHEMBL250148 |
| 1500 train 5.9300 6.3468 0.4168 CHEMBL249165 |
| 1501 test 7.4000 6.9571 -0.4429 CHEMBL191384 |
| 1502 train 7.1200 6.8178 -0.3022 CHEMBL328194 |
| 1503 train 7.3500 7.0155 -0.3345 CHEMBL1761791 |
| 1504 train 4.5200 5.4449 0.9249 CHEMBL2312652 |
| 1505 test 4.5200 5.4646 0.9446 CHEMBL2312646 |
| 1506 train 8.0000 8.3666 0.3666 CHEMBL361708 |
| 1507 test 8.0000 8.3897 0.3897 CHEMBL361708 |
| 1508 test 7.6200 7.6103 -0.0097 CHEMBL516261 |
| 1509 test 6.7200 7.1124 0.3924 CHEMBL575882 |
| 1510 train 9.7000 8.6048 -1.0952 CHEMBL5270781 |
| 1511 test 9.0200 8.5218 -0.4982 CHEMBL5273034 |
| 1512 train 6.6000 6.8686 0.2686 CHEMBL1940904 |
| 1513 train 7.3400 7.9612 0.6212 CHEMBL1957958 |
| 1514 train 5.6800 6.3559 0.6759 CHEMBL112819 |
| 1515 test 8.1900 7.8986 -0.2914 CHEMBL1081617 |
| 1516 train 7.3300 6.8672 -0.4628 CHEMBL1834118 |
| 1517 test 7.0000 6.7071 -0.2929 CHEMBL1834119 |
| 1518 test 5.4600 5.7330 0.2730 CHEMBL4204286 |
| 1519 train 6.5000 5.9944 -0.5056 CHEMBL251886 |
| 1520 train 7.7000 7.3216 -0.3784 CHEMBL352222 |
| 1521 train 5.3500 5.2837 -0.0663 CHEMBL4097781 |
| 1522 test 5.3500 5.2203 -0.1297 CHEMBL4097781 |
| 1523 train 7.9000 7.7641 -0.1359 CHEMBL304172 |
| 1524 train 6.5100 7.0914 0.5814 CHEMBL569046 |
| 1525 train 5.6000 7.0238 1.4238 CHEMBL293191 |
| 1526 train 7.6000 7.7494 0.1494 CHEMBL305477 |
| 1527 test 7.0700 6.8193 -0.2507 CHEMBL2064518 |
| 1528 train 8.8000 8.0550 -0.7450 CHEMBL304533 |
| 1529 test 7.7700 7.3296 -0.4404 CHEMBL340935 |
| 1530 train 8.0000 7.2286 -0.7714 CHEMBL299756 |
| 1531 train 7.8900 7.4311 -0.4589 CHEMBL2347053 |
| 1532 train 8.0400 7.2444 -0.7956 CHEMBL388978 |
| 1533 test 8.1500 7.4311 -0.7189 CHEMBL109981 |
| 1534 train 6.0800 5.3245 -0.7555 CHEMBL3099840 |
| 1535 train 5.8900 5.6829 -0.2071 CHEMBL3099838 |
| 1536 train 5.8200 5.8686 0.0486 CHEMBL75680 |
| 1537 train 7.0500 7.0801 0.0301 CHEMBL322970 |
| 1538 test 5.6500 6.2258 0.5758 CHEMBL1669588 |
| 1539 train 7.7600 6.8613 -0.8987 CHEMBL1682842 |
| 1540 train 6.3000 5.9209 -0.3791 CHEMBL142826 |
| 1541 test 6.0000 5.8797 -0.1203 CHEMBL103009 |
| 1542 train 4.2600 5.4861 1.2261 CHEMBL2420911 |
| 1543 train 4.2600 5.4861 1.2261 CHEMBL2420911 |
| 1544 train 6.3600 5.8762 -0.4838 CHEMBL1630464 |
| 1545 test 6.1800 6.9278 0.7478 CHEMBL1630489 |
| 1546 train 4.7500 5.2468 0.4968 CHEMBL76427 |
| 1547 train 6.9000 6.1961 -0.7039 CHEMBL1738951 |
| 1548 train 8.3000 7.3551 -0.9449 CHEMBL1809113 |
| 1549 train 5.6000 4.8616 -0.7384 CHEMBL143090 |
| 1550 test 7.7500 6.9517 -0.7983 CHEMBL325654 |
| 1551 train 6.7400 6.3065 -0.4335 CHEMBL3828150 |
| 1552 train 6.3400 6.1040 -0.2360 CHEMBL77264 |
| 1553 train 5.3700 5.7865 0.4165 CHEMBL95477 |
| 1554 train 5.4800 5.2219 -0.2581 CHEMBL77590 |
| 1555 train 7.4000 7.5005 0.1005 CHEMBL5172659 |
| 1556 train 5.5200 5.1199 -0.4001 CHEMBL2037482 |
| 1557 train 7.7700 7.8749 0.1049 CHEMBL2048664 |
| 1558 train 7.7700 7.8749 0.1049 CHEMBL2048664 |
| 1559 train 8.1000 7.4769 -0.6231 CHEMBL2048665 |
| 1560 train 8.1000 7.4769 -0.6231 CHEMBL2048665 |
| 1561 train 7.9200 7.9634 0.0434 CHEMBL2048671 |
| 1562 test 7.9200 7.9634 0.0434 CHEMBL2048671 |
| 1563 train 5.3900 6.6750 1.2850 CHEMBL489413 |
| 1564 train 8.7400 8.5974 -0.1426 CHEMBL1081973 |
| 1565 train 8.4900 8.4873 -0.0027 CHEMBL1081294 |
| 1566 train 7.3800 7.8721 0.4921 CHEMBL1087380 |
| 1567 train 8.1800 7.8549 -0.3251 CHEMBL1087242 |
| 1568 train 7.7000 7.3864 -0.3136 CHEMBL26501 |
| 1569 train 8.0000 7.7485 -0.2515 CHEMBL1088724 |
| 1570 train 6.5500 6.6585 0.1085 CHEMBL326705 |
| 1571 train 6.5500 6.6585 0.1085 CHEMBL326705 |
| 1572 train 7.5100 7.6698 0.1598 CHEMBL430694 |
| 1573 train 7.7500 6.5473 -1.2027 CHEMBL3735506 |
| 1574 test 7.7500 6.5473 -1.2027 CHEMBL3735506 |
| 1575 test 7.7000 7.6835 -0.0165 CHEMBL4635680 |
| 1576 train 7.7000 7.6835 -0.0165 CHEMBL4635680 |
| 1577 train 7.4100 7.2699 -0.1401 CHEMBL4645145 |
| 1578 train 7.4100 7.2699 -0.1401 CHEMBL4645145 |
| 1579 test 5.8500 5.6910 -0.1590 CHEMBL2062577 |
| 1580 train 7.1900 6.3130 -0.8770 CHEMBL594933 |
| 1581 train 7.1900 6.3130 -0.8770 CHEMBL594933 |
| 1582 train 5.3000 4.9575 -0.3425 CHEMBL611357 |
| 1583 train 6.0000 5.7502 -0.2498 CHEMBL596352 |
| 1584 train 6.0000 5.9234 -0.0766 CHEMBL596006 |
| 1585 test 6.8300 8.6306 1.8006 CHEMBL2386274 |
| 1586 train 8.1000 7.4963 -0.6037 CHEMBL69757 |
| 1587 train 5.1400 5.4092 0.2692 CHEMBL77210 |
| 1588 train 5.6400 5.2368 -0.4032 CHEMBL305901 |
| 1589 train 6.0000 5.9621 -0.0379 CHEMBL77469 |
| 1590 train 6.0200 6.7339 0.7139 CHEMBL401918 |
| 1591 test 6.5000 6.8795 0.3795 CHEMBL1809117 |
| 1592 train 6.8500 6.3670 -0.4830 CHEMBL3632824 |
| 1593 train 5.9200 6.1977 0.2777 CHEMBL2024371 |
| 1594 train 5.6400 6.0836 0.4436 CHEMBL483842 |
| 1595 test 8.5500 7.8305 -0.7195 CHEMBL6291 |
| 1596 train 7.5200 8.2007 0.6807 CHEMBL559559 |
| 1597 train 3.4600 4.6848 1.2248 CHEMBL48082 |
| 1598 test 6.3300 6.0765 -0.2535 CHEMBL458636 |
| 1599 train 5.8500 5.5244 -0.3256 CHEMBL284861 |
| 1600 train 6.8200 6.4409 -0.3791 CHEMBL1773425 |
| 1601 train 4.6800 5.3367 0.6567 CHEMBL1910509 |
| 1602 train 5.4500 5.8302 0.3802 CHEMBL4169102 |
| 1603 train 5.1500 5.8879 0.7379 CHEMBL4170146 |
| 1604 train 5.2200 6.2509 1.0309 CHEMBL4177365 |
| 1605 train 5.4900 6.5466 1.0566 CHEMBL4555766 |
| 1606 train 7.1400 6.7077 -0.4323 CHEMBL259850 |
| 1607 test 5.3800 6.3502 0.9702 CHEMBL4571262 |
| 1608 train 5.3900 6.2428 0.8528 CHEMBL4573681 |
| 1609 test 6.5800 5.5373 -1.0427 CHEMBL1630445 |
| 1610 test 4.3000 6.2993 1.9993 CHEMBL1801620 |
| 1611 train 6.6600 6.7077 0.0477 CHEMBL259850 |
| 1612 train 7.9200 8.8682 0.9482 CHEMBL362814 |
| 1613 train 5.2200 5.7036 0.4836 CHEMBL77211 |
| 1614 test 7.4200 8.5722 1.1522 CHEMBL181464 |
| 1615 test 5.5000 6.6949 1.1949 CHEMBL1809119 |
| 1616 train 9.3300 8.3573 -0.9727 CHEMBL3091541 |
| 1617 train 9.0600 8.1128 -0.9472 CHEMBL3091540 |
| 1618 train 8.3400 8.1637 -0.1763 CHEMBL3091464 |
| 1619 train 8.5400 8.1517 -0.3883 CHEMBL3091538 |
| 1620 train 5.9200 6.4152 0.4952 CHEMBL1834109 |
| 1621 train 7.4700 7.0801 -0.3899 CHEMBL322970 |
| 1622 test 7.4900 7.4744 -0.0156 CHEMBL5186025 |
| 1623 train 5.3900 6.1841 0.7941 CHEMBL1669587 |
| 1624 train 7.0400 7.0643 0.0243 CHEMBL5596209 |
| 1625 test 9.4600 8.8994 -0.5606 CHEMBL5419652 |
| 1626 train 6.7100 6.0835 -0.6265 CHEMBL5411160 |
| 1627 train 7.3100 7.4071 0.0971 CHEMBL4559169 |
| 1628 test 5.5200 5.8000 0.2800 CHEMBL26274 |
| 1629 train 4.1600 4.8773 0.7173 CHEMBL24773 |
| 1630 train 8.2200 7.7721 -0.4479 CHEMBL111005 |
| 1631 test 6.0000 5.8797 -0.1203 CHEMBL103009 |
| 1632 train 6.0000 6.2569 0.2569 CHEMBL3545157 |
| 1633 train 5.5500 5.1199 -0.4301 CHEMBL2037482 |
| 1634 test 8.1000 7.3799 -0.7201 CHEMBL109977 |
| 1635 train 6.1100 6.3244 0.2144 CHEMBL4532931 |
| 1636 train 6.8000 7.6743 0.8743 CHEMBL63348 |
| 1637 train 6.8200 6.9650 0.1450 CHEMBL3093052 |
| 1638 test 6.8900 7.0312 0.1412 CHEMBL3093051 |
| 1639 test 7.6400 6.5102 -1.1298 CHEMBL3093050 |
| 1640 train 5.9000 6.4634 0.5634 CHEMBL4176717 |
| 1641 test 5.9000 6.4634 0.5634 CHEMBL4176717 |
| 1642 train 6.4400 6.6401 0.2001 CHEMBL4520113 |
| 1643 train 6.2700 6.6834 0.4134 CHEMBL4547931 |
| 1644 test 6.6300 7.3319 0.7019 CHEMBL4589431 |
| 1645 train 6.6300 7.3319 0.7019 CHEMBL4589431 |
| 1646 train 5.8200 6.5292 0.7092 CHEMBL4452170 |
| 1647 train 4.1900 5.1206 0.9306 CHEMBL284125 |
| 1648 test 5.6000 6.4930 0.8930 CHEMBL1809108 |
| 1649 train 8.0000 6.9782 -1.0218 CHEMBL1809115 |
| 1650 train 6.9000 6.6949 -0.2051 CHEMBL1809119 |
| 1651 test 5.0000 6.3144 1.3144 CHEMBL1809112 |
| 1652 test 5.3000 6.4577 1.1577 CHEMBL1809120 |
| 1653 train 5.1000 5.9493 0.8493 CHEMBL1809122 |
| 1654 train 7.4600 6.6884 -0.7716 CHEMBL495039 |
| 1655 train 7.3500 6.8861 -0.4639 CHEMBL1834114 |
| 1656 test 7.3500 6.4381 -0.9119 CHEMBL1834117 |
| 1657 test 7.5100 6.7684 -0.7416 CHEMBL1834125 |
| 1658 train 7.3600 7.0497 -0.3103 CHEMBL1834323 |
| 1659 train 5.9500 5.5164 -0.4336 CHEMBL3735637 |
| 1660 train 5.9500 5.5164 -0.4336 CHEMBL3735637 |
| 1661 test 6.6800 6.8341 0.1541 CHEMBL3735730 |
| 1662 train 6.6800 6.8341 0.1541 CHEMBL3735730 |
| 1663 train 6.5800 6.6992 0.1192 CHEMBL3735613 |
| 1664 train 6.5800 6.6992 0.1192 CHEMBL3735613 |
| 1665 train 8.2200 8.1749 -0.0451 CHEMBL1957955 |
| 1666 test 5.8000 7.5478 1.7478 CHEMBL1957943 |
| 1667 train 7.7500 7.3315 -0.4185 CHEMBL331000 |
| 1668 train 6.6300 6.9831 0.3531 CHEMBL1682840 |
| 1669 test 7.0800 6.8487 -0.2313 CHEMBL1682848 |
| 1670 train 7.6000 7.7293 0.1293 CHEMBL272629 |
| 1671 train 5.8500 5.9113 0.0613 CHEMBL37811 |
| 1672 train 7.4300 7.6218 0.1918 CHEMBL324268 |
| 1673 test 8.0000 8.3666 0.3666 CHEMBL361708 |
| 1674 train 8.0000 8.3897 0.3897 CHEMBL361708 |
| 1675 train 8.1500 7.9012 -0.2488 CHEMBL562023 |
| 1676 test 8.7200 8.4929 -0.2271 CHEMBL2386092 |
| 1677 train 8.3800 8.6246 0.2446 CHEMBL368248 |
| 1678 train 7.7500 6.8597 -0.8903 CHEMBL2386108 |
| 1679 train 8.2800 7.7562 -0.5238 CHEMBL2386106 |
| 1680 train 7.7000 7.2946 -0.4054 CHEMBL2386102 |
| 1681 train 6.3900 7.0038 0.6138 CHEMBL2386100 |
| 1682 train 5.6800 5.6592 -0.0208 CHEMBL3891166 |
| 1683 train 5.6200 5.7553 0.1353 CHEMBL3933598 |
| 1684 train 6.0200 6.1767 0.1567 CHEMBL561930 |
| 1685 train 4.6500 5.2731 0.6231 CHEMBL552406 |
| 1686 train 5.4500 6.3341 0.8841 CHEMBL4210171 |
| 1687 test 6.4000 7.0925 0.6925 CHEMBL4435922 |
| 1688 test 6.8800 7.3308 0.4508 CHEMBL4473730 |
| 1689 train 6.8800 7.3308 0.4508 CHEMBL4473730 |
| 1690 train 6.3200 7.2840 0.9640 CHEMBL5280305 |
| 1691 train 6.5700 7.6076 1.0376 CHEMBL5278701 |
| 1692 train 5.1400 5.6783 0.5383 CHEMBL3099842 |
| 1693 train 6.1200 5.5674 -0.5526 CHEMBL564033 |
| 1694 train 5.5800 5.5966 0.0166 CHEMBL563121 |
| 1695 train 7.7200 8.3425 0.6225 CHEMBL5267631 |
| 1696 test 8.2300 6.9839 -1.2461 CHEMBL5278465 |
| 1697 train 8.9200 7.7468 -1.1732 CHEMBL5290300 |
| 1698 train 7.7000 7.7468 0.0468 CHEMBL5286049 |
| 1699 train 7.2900 7.3543 0.0643 CHEMBL3091546 |
| 1700 test 7.1000 5.6256 -1.4744 CHEMBL3828240 |
| 1701 train 6.8700 6.3622 -0.5078 CHEMBL3828098 |
| 1702 test 8.0500 7.4011 -0.6489 CHEMBL337300 |
| 1703 test 6.7000 6.2183 -0.4817 CHEMBL318471 |
| 1704 train 4.6200 5.3315 0.7115 CHEMBL97844 |
| 1705 test 6.4600 6.1946 -0.2654 CHEMBL121958 |
| 1706 train 6.8000 7.0067 0.2067 CHEMBL291425 |
| 1707 test 7.7500 6.5895 -1.1605 CHEMBL393525 |
| 1708 train 5.2000 4.4536 -0.7464 CHEMBL297453 |
| 1709 train 5.3600 4.8478 -0.5122 CHEMBL1232500 |
| 1710 test 7.7700 7.0460 -0.7240 CHEMBL1630452 |

NPA014875

NPA011425


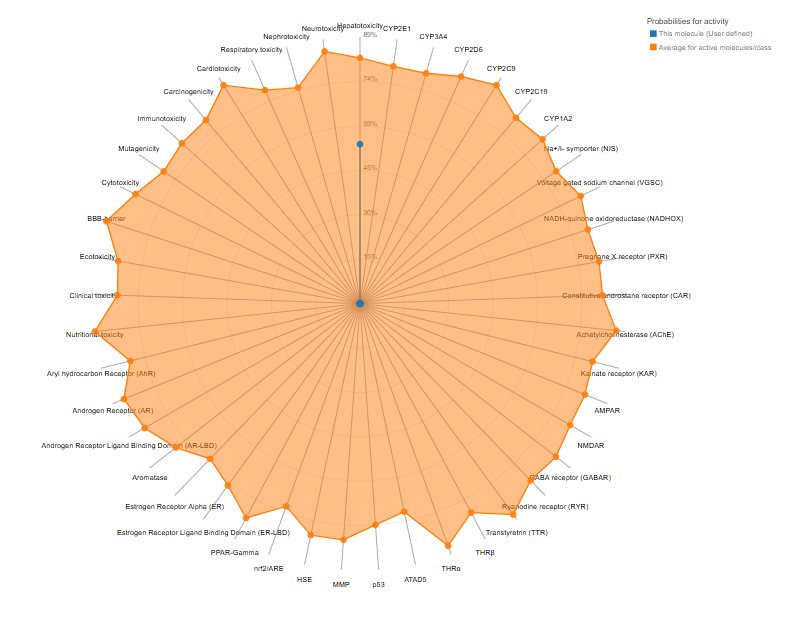

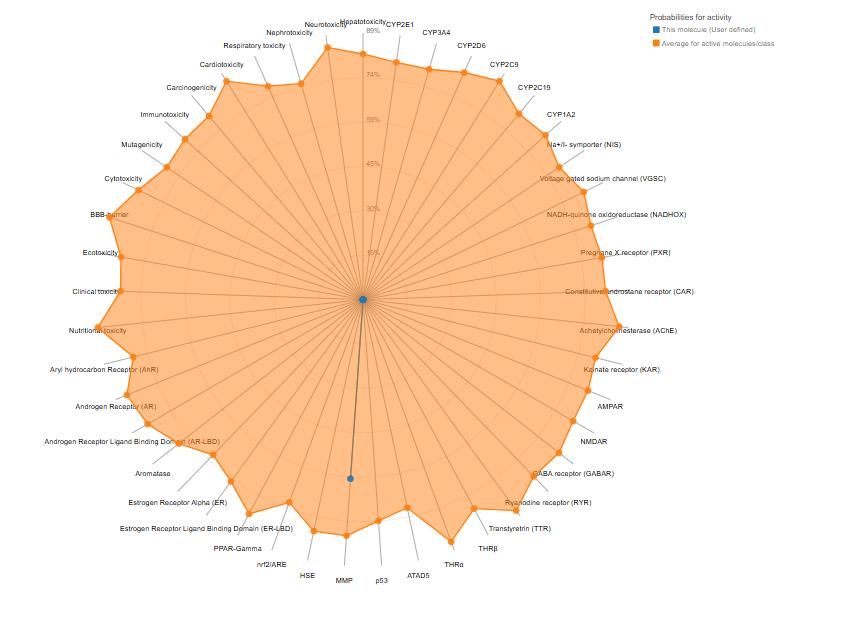


NPA020257

NPA004276


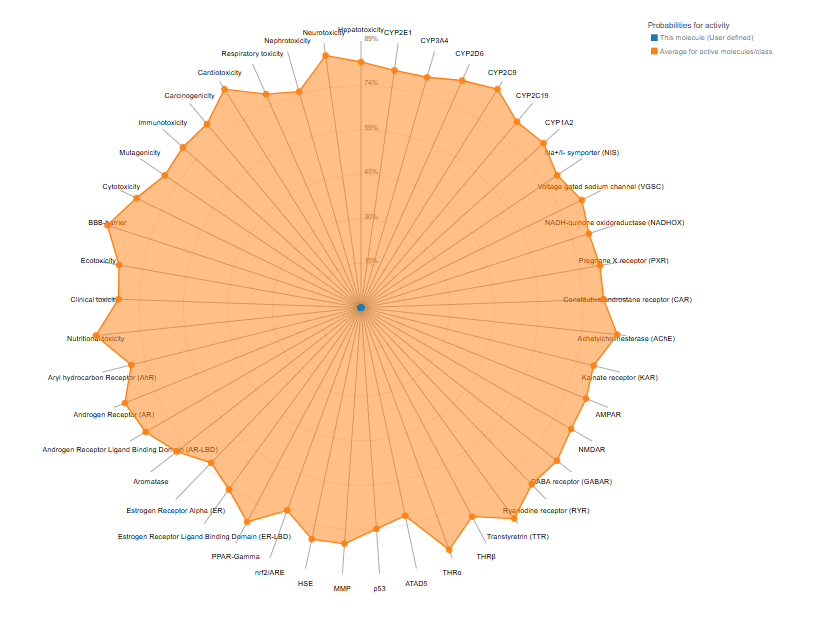

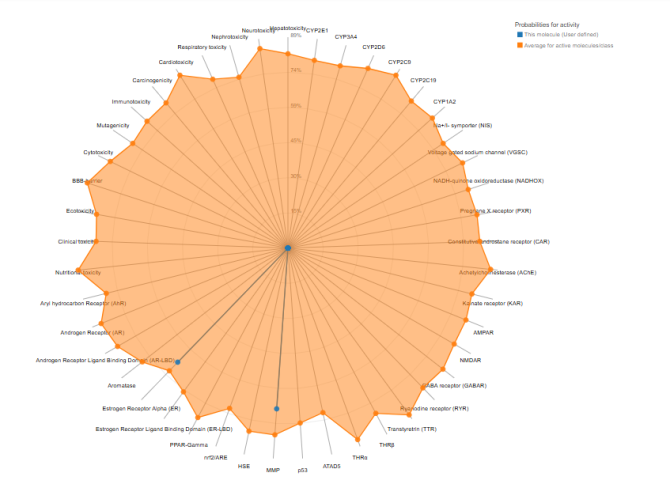


NPA036064

NPA034843


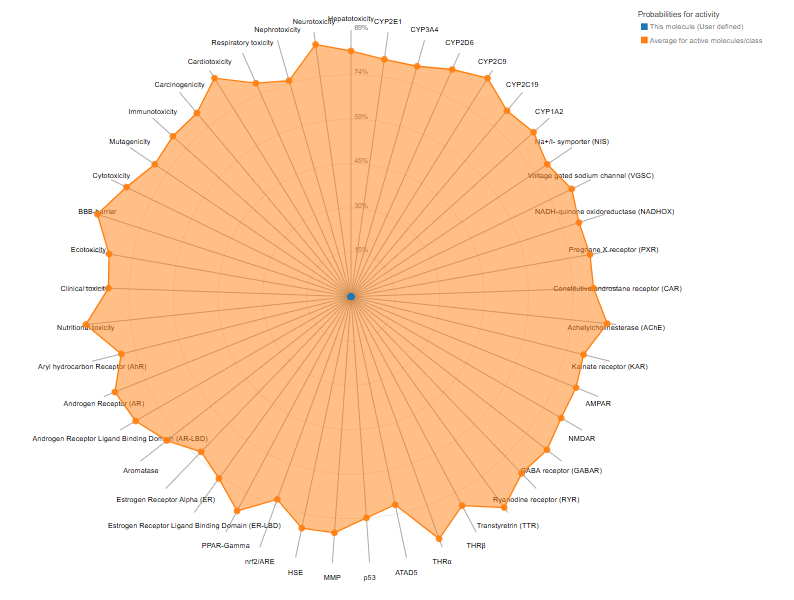

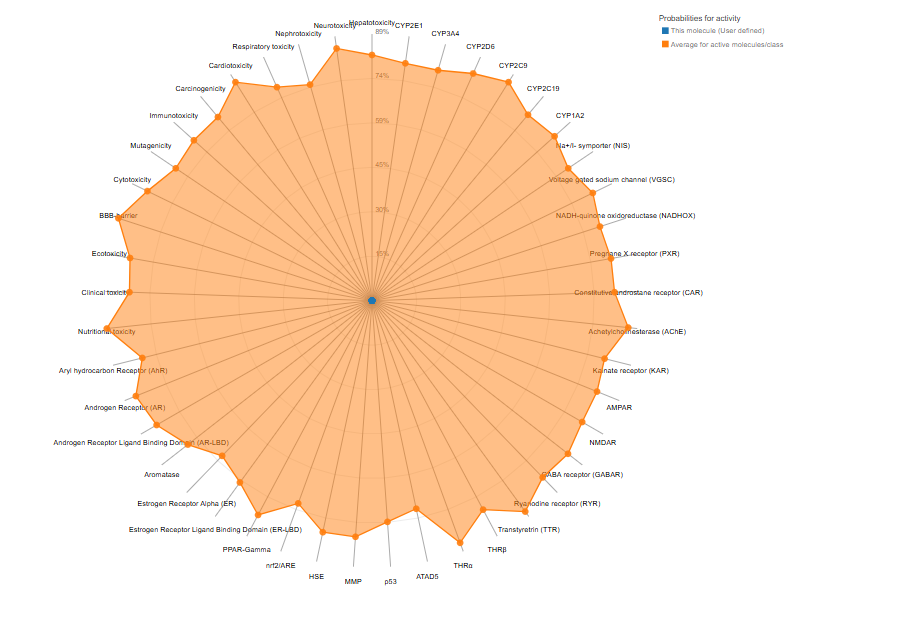


Reference

AR-A014418


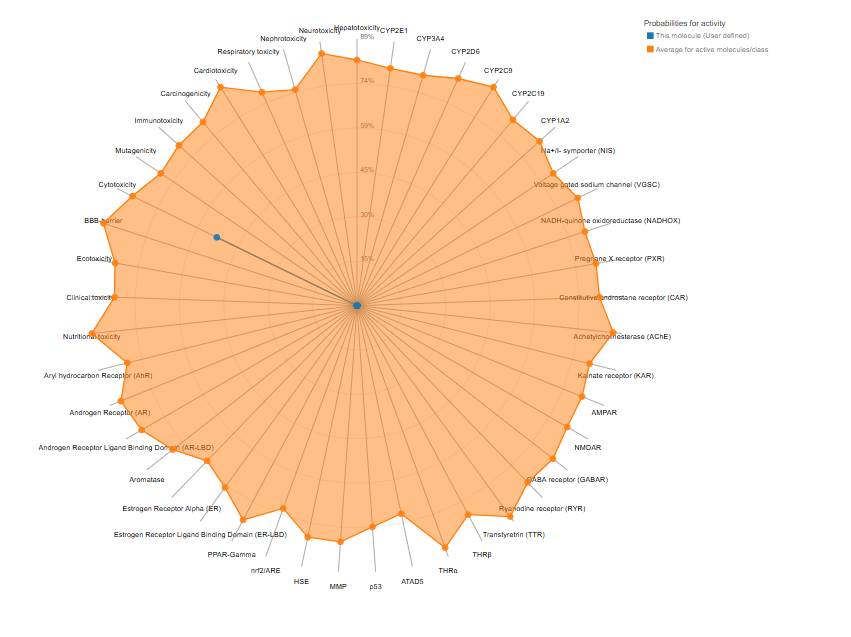

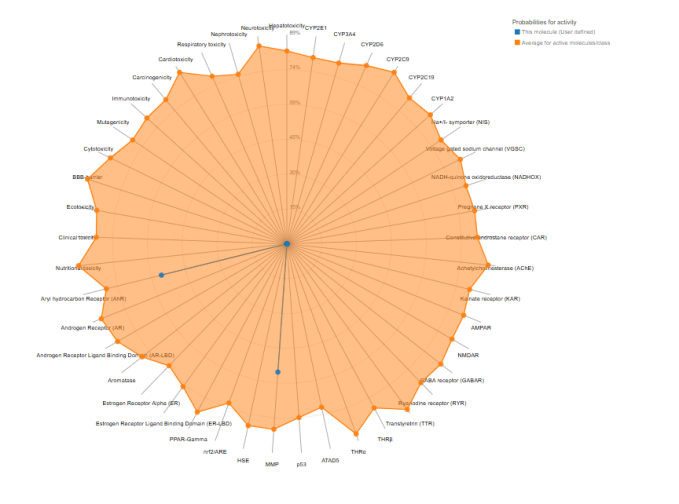


Tideglusib


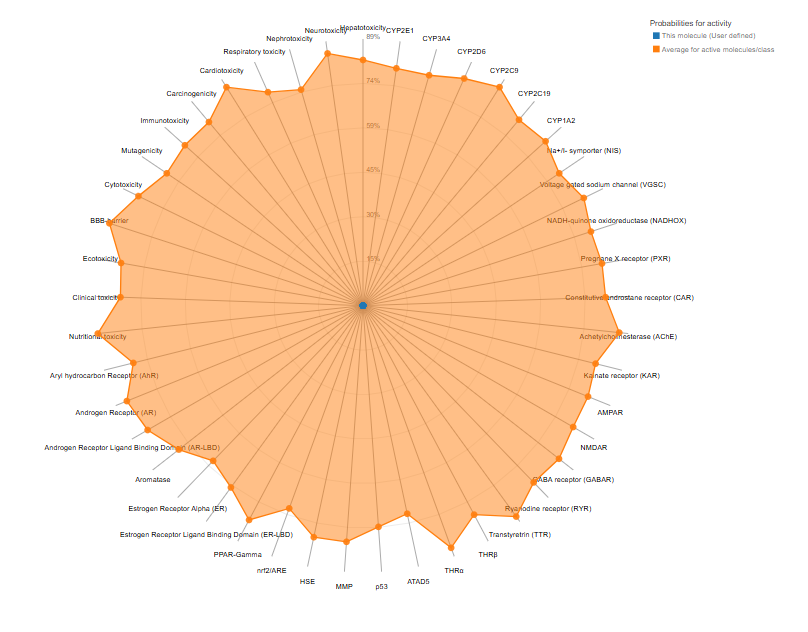


**Figure 1:** Radar for toxicity prediction by Protox-3
